# Supplementary material for: The iPROMOS protocol: a stepped-wedge study to implement routine patient-reported outcomes in a medical oncology outpatient setting
Source: PubMed Central journal article supplement — BMJ Open. 2019 Feb 24;9(2):e027046. doi: 10.1136/bmjopen-2018-027046 (PMC6443070; doi:10.1136/bmjopen-2018-027046), 2019-02-24
Supplement: bmjopen-2018-027046.draft_revisions.pdf [file bmjopen-2018-027046.draft_revisions.pdf]

# BMJ Open

BMJ Open is committed to open peer review. As part of this commitment we make the peer review history of every article we publish publicly available.

When an article is published we post the peer reviewers' comments and the authors' responses online. We also post the versions of the paper that were used during peer review. These are the versions that the peer review comments apply to.

The versions of the paper that follow are the versions that were submitted during the peer review process. They are not the versions of record or the final published versions. They should not be cited or distributed as the published version of this manuscript.

BMJ Open is an open access journal and the full, final, typeset and author-corrected version of record of the manuscript is available on our site with no access controls, subscription charges or pay-per-view fees (<http://bmjopen.bmj.com>).

If you have any questions on BMJ Open's open peer review process please email [info.bmjopen@bmj.com](mailto:info.bmjopen@bmj.com)

# BMJ Open

## The iPROMOS Protocol: A Stepped-Wedge Study to Implement Routine Patient Reported Outcomes in a Medical Oncology Outpatient Setting

|                               |                                                                                                                                                                                                                                                                                                                                                                                                                                                                                                                                                                                                                           |
|-------------------------------|---------------------------------------------------------------------------------------------------------------------------------------------------------------------------------------------------------------------------------------------------------------------------------------------------------------------------------------------------------------------------------------------------------------------------------------------------------------------------------------------------------------------------------------------------------------------------------------------------------------------------|
| Journal:                      | <i>BMJ Open</i>                                                                                                                                                                                                                                                                                                                                                                                                                                                                                                                                                                                                           |
| Manuscript ID                 | bmjopen-2018-027046                                                                                                                                                                                                                                                                                                                                                                                                                                                                                                                                                                                                       |
| Article Type:                 | Protocol                                                                                                                                                                                                                                                                                                                                                                                                                                                                                                                                                                                                                  |
| Date Submitted by the Author: | 10-Oct-2018                                                                                                                                                                                                                                                                                                                                                                                                                                                                                                                                                                                                               |
| Complete List of Authors:     | Roberts, Natasha; Queensland University of Technology Faculty of Health, ; Royal Brisbane and Women's Hospital, Mudge, Alison; Royal Brisbane and Women's Hospital, Department of Internal Medicine and Aged Care<br>Alexander, Kim; Queensland University of Technology Faculty of Health, School of Nursing<br>Wyld, David; Royal Brisbane and Women's Hospital, Cancer Care Services<br>Janda, Monika; University of Queensland, Centre of Health Services Research, Faculty of Medicine; Queensland University of Technology, School of Public Health and Social Work, Institute for Health and Biomedical Innovation |
| Keywords:                     | PROMs, implementation, complex intervention, PRO-CTCAE, iPARIHS                                                                                                                                                                                                                                                                                                                                                                                                                                                                                                                                                           |
|                               |                                                                                                                                                                                                                                                                                                                                                                                                                                                                                                                                                                                                                           |

SCHOLARONE™  
Manuscripts

1                   **The iPROMOS Protocol: A Stepped-Wedge Study to**  
2                   **Implement Routine Patient Reported Outcomes in a**  
3                   **Medical Oncology Outpatient Setting**

4  
5                   Natasha A Roberts<sup>1,2</sup>

6                   [n6.roberts@hdr.qut.edu.au](mailto:n6.roberts@hdr.qut.edu.au)

7                   Cancer Care Services

8                   Royal Brisbane and Women's Hospital,

9                   QLD, Australia

10  
11                  School of Public Health and Social Work,

12                  Queensland University of Technology,

13                  Musk Avenue, Kelvin Grove, QLD, 4059

14  
15                  Alison Mudge<sup>1,2</sup>

16                  Alison.mudge@health.qld.gov.au

17                  Department of Internal Medicine and Aged Care

18                  Royal Brisbane and Women's Hospital

19                  QLD, Australia

20                  School of Public Health and Social Work,

21                  Queensland University of Technology,

22                  Musk Avenue, Kelvin Grove, QLD, 4059

---

1  
2  
3 23  
4

5 24 Kimberly Alexander<sup>1</sup>

6  
7 25 [k.alexander@qut.edu.au](mailto:k.alexander@qut.edu.au)

8  
9 26 School of Nursing

10  
11 27 Queensland University of Technology

12  
13 28 Musk Avenue, QLD, 4059

14  
15  
16 29

17  
18 30 David Wyld<sup>1,3</sup>

19  
20 31 [david.wyld@health.qld.gov.au](mailto:david.wyld@health.qld.gov.au)

21  
22 32 Cancer Care Services

23  
24 33 Royal Brisbane and Women's Hospital

25  
26 34 QLD, Australia

27  
28  
29 35

30  
31 36 School of Medicine,

32  
33 37 University of Queensland, QLD, Australia

34  
35  
36 38

37  
38 39 Monika Janda<sup>1,3</sup>

39  
40 40 [m.janda@uq.edu.au](mailto:m.janda@uq.edu.au)

41  
42 41 Centre for Health Services Research,

43  
44 42 The University of Queensland, QLD, Australia

45  
46  
47 43

48  
49 44 School of Public Health and Social Work,

50  
51 45 Queensland University of Technology,

52  
53 46 QLD, Australia

54  
55  
56  
57  
58  
59  
60

1  
2  
3  
4  
5  
6  
7  
8  
9  
10  
11  
12  
13  
14  
15  
16  
17  
18  
19  
20  
21  
22  
23  
24  
25  
26  
27  
28  
29  
30  
31  
32  
33  
34  
35  
36  
37  
38  
39  
40  
41  
42  
43  
44  
45  
46  
47  
48  
49  
50  
51  
52  
53  
54  
55  
56  
57  
58  
59  
60

47 Correspondence:

48 Natasha A Roberts

49 N6.roberts@hdr.qut.edu.au

- 50 1. Queensland University of Technology, QLD, Australia
- 51 2. Royal Brisbane and Women’s Hospital, QLD, Australia
- 52 3. The University of Queensland, QLD Australia

53

For peer review only

1  
2  
3 54 Abstract:

4  
5 55 Introduction: Patient Reported Outcomes (PROMs) are data capture tools that collect  
6  
7 56 information directly from patients. Several large research studies provide evidence  
8  
9 57 that use of PROMs in routine care provides benefits to mortality and morbidity  
10  
11 58 outcomes in medical oncology patients. Despite this, implementation of PROMs in  
12  
13 59 daily clinical routine is slow and challenging.

14  
15  
16  
17 60 Methods and Analysis: This study will use a stepped-wedge design to assess the  
18  
19 61 implementation of a PROM intervention in highly frequented medical oncology  
20  
21 62 outpatient clinics. During a lead-in period of four weeks, control data will be  
22  
23 63 collected. The intervention will then be implemented for four weeks in Clinic 1  
24  
25 64 initially, then in Clinic 2 for another four weeks. 500 patient encounters will be  
26  
27 65 measured over the 12 weeks in total. The process of implementation will be informed  
28  
29 66 and evaluated using the Medical Research Council (MRC) Guidelines for  
30  
31 67 Implementing Complex Interventions. The study will be guided by the iPARIHS  
32  
33 68 framework approach to implementation. The intervention and implementation  
34  
35 69 outcomes will be measured using qualitative and quantitative data.

36  
37  
38  
39 70 Ethics and Dissemination: Ethical approval has been obtained, approval number  
40  
41 71 HREC/16/QRBW/100.

42  
43  
44  
45 72 Trial Registration Number: Australian New Zealand Clinical Trials Registry  
46  
47 73 (ANZCTR): ACTRN12618000398202.

48  
49  
50 74 Article Summary:

51  
52  
53  
54 75

1  
2  
3 76 Strengths and limitations of this study  
4  
5

6 77 Limitations:  
7  
8

- 9  
10 78 • One non-blinded researcher will implement the intervention, collect and analyse the  
11  
12 79 data.  
13  
14 80 • Response bias and social desirability bias (of both health professionals and patients  
15  
16  
17 81 that choose to participate)  
18  
19 82 • Bias by the Hawthorne Effect whereby clinics being observed during the pre-  
20  
21 83 implementation phase may start to change practice.  
22  
23

24  
25 84 Strengths  
26  
27

- 28 85 • A stepped-wedge design ensures an incremental implementation into clinical  
29  
30 86 practice.  
31  
32 87 • Prospective use of an implementation framework will make sure that enablers and  
33  
34  
35 88 barriers in the setting are collected and reported allowing the findings from this  
36  
37 89 study to inform future integration of PROMs into routine clinical care.  
38  
39

40  
41 90  
42  
43

44 91  
45  
46

47 92  
48  
49  
50  
51  
52  
53  
54  
55  
56  
57  
58  
59  
60

1  
2  
3 93 Introduction:  
4  
5

6 94 *What are Patient Reported Outcome Measures (PROMs)?*  
7  
8

9  
10 95 The Federal Drug Administration (FDA) defines PROMs as “any report of the status  
11  
12 96 of a patient’s health condition that comes directly from the patient, without  
13  
14 97 interpretation of the patient’s response by a clinician or anyone else” [1]. Revicki et al  
15  
16 98 (2000) describe PROMs as validated self-reporting assessment tools that capture  
17  
18 99 the patient experience [2]. PROMs have been extensively evaluated for their  
19  
20  
21 100 sensitivity, specificity, overall accuracy and predictive value. They are now regarded  
22  
23 101 to have excellent precision, similar to many other widely-used clinical assessment  
24  
25 102 tools including pathological tests or medical imaging reports [3]. PROMs can provide  
26  
27 103 an overview of a patient’s physical, emotional, functional or overall health status, or  
28  
29 104 can be used to assess specific treatment outcomes or symptoms [4].  
30

31  
32  
33 105 *PROMs in clinical practice*  
34

35  
36 106 PROMs are commonly used as outcome measures in research. However more  
37  
38 107 recently there is evidence that their real-time application in clinical practice can  
39  
40 108 enhance clinical interactions and improve patient experience. Several studies have  
41  
42 109 shown improved quality of life (QOL) [3, 5] as well as improved communication and  
43  
44 110 care planning [6, 7] following their use during routine care delivery. Two recent  
45  
46 111 studies demonstrated improvements in patient mortality and morbidity when  
47  
48 112 technology-facilitated PROMs data collection was incorporated in oncology care [5,  
49  
50  
51 113 8, 9].  
52  
53  
54  
55  
56  
57  
58  
59  
60



1  
2  
3 114 Given these evidence-based benefits, translating these findings into practice by  
4  
5 115 integrating PROMs into routine clinical care is the next required step in the  
6  
7 116 implementation cycle.  
8  
9

10 117 *The Complexities of Implementing PROMs into the Clinical Setting*  
11

12  
13 118 A number of systematic reviews [3, 10, 11] reported that multiple organisational,  
14  
15 119 technical and clinical factors need to be overcome before introducing PROMs. In  
16  
17 120 particular, a lack of engagement from health care professionals, concerns about the  
18  
19 121 workflow of generating and filing of PROM reports, and lack of clearly defined  
20  
21 122 approaches in how to respond to the PROM data that indicate a patient need (e.g.  
22  
23 123 elevated pain or depression) have been identified as barriers to successful  
24  
25 124 implementation. The International Society of Quality of Life (ISOQOL) advocates a  
26  
27 125 stepwise approach to implementing PROMs, and provides a User's Guide [12],  
28  
29 126 which was updated in 2018. Klinkhammer-Schalke (2014) identified that a stepwise  
30  
31 127 approach was most useful when integrating a PROM intervention into routine care,  
32  
33 128 as it allows cycles of iterative learning during the implementation [7].  
34  
35  
36  
37

38 129 Incorporating PROMs into clinical practice should be considered a complex  
39  
40 130 intervention, with many elements impacting on the intervention, and vice versa [13]  
41

42  
43 131 Given these complexities, it has been recommended to use an implementation  
44  
45 132 framework to increase the likelihood of success when aiming to integrate PROMs  
46  
47 133 into routine care [14]. Use of a framework approach can help to consider both the  
48  
49 134 processes and intended outcomes of implementation. The Promoting Action  
50  
51 135 Research in Health Services (i-PARIHS) framework appears well suited, as it  
52  
53 136 highlights elements for consideration within the context (e.g. the features of the  
54  
55 137 particular clinic in which PROMs are to be integrated), the stakeholders (e.g.  
56  
57  
58  
59  
60

1  
2  
3 138 patients, clinicians, administrative staff) impacted by the intervention, and the  
4  
5 139 evidence surrounding the intervention (e.g. how much do stakeholders value the new  
6  
7 140 PROM information presented to them) [15]. A unique feature of iPARIHS is that it  
8  
9 141 stresses the central importance of a facilitator, who works with the local stakeholders  
10  
11 142 to adapt the evidence-based intervention for the local context. Antune's (2014)  
12  
13 143 systematic review provided evidence for the important role of a facilitator of the  
14  
15 144 implementation process [3], with enhanced successful uptake if one was present  
16  
17 145 [16,17]. For example, Baskerville et al (2012) showed that medical practices were  
18  
19 146 2.76 more likely to adopt evidence-based guidelines when a facilitator was working  
20  
21 147 in the local context [16].  
22  
23  
24

25 148 Besides the implementation framework, the Medical Research Council (MRC)  
26  
27 149 Guidelines for Implementation of Complex Interventions can provide guidance on  
28  
29 150 how to best incorporate pre-specified process measure. The Guidelines "can be  
30  
31 151 used to assess fidelity and quality of implementation, clarify causal mechanisms and  
32  
33 152 identify contextual factors associated with variation in outcomes" [17]. The MRC  
34  
35 153 approach ensures active evaluation throughout the implementation, and highlights  
36  
37 154 how to mitigate the impact that the introduction of new workflows has on the context,  
38  
39 155 participants and the intervention.  
40  
41  
42  
43

44 156 In summary, the aim of this implementation study is to investigate implementation of  
45  
46 157 symptom reporting PROMs system into the outpatient oncology setting. The  
47  
48 158 objective of the intervention will be to increase detection of symptoms by clinicians  
49  
50 159 using the PROMs data. The implementation objectives include the successful  
51  
52 160 engagement of clinicians to use PROMs in clinical practice, the successful use of  
53  
54  
55  
56  
57  
58  
59  
60

1  
2  
3 161 technology to obtain PROMs data from patients and present reports to clinicians,  
4  
5 162 and the identification of appropriate local strategies to respond to PROM information.  
6  
7

8 163 Methods and Analysis:  
9

10  
11 164 *Study design*  
12

13  
14 165 This mixed-methods study will use a stepped wedge cluster design. PROMs will be  
15  
16 166 introduced sequentially into two independent clinics, and all intervention and  
17  
18 167 implementation outcomes will be prospectively evaluated. The stepped wedge  
19  
20 168 approach has been chosen as it is a pragmatic solution for the systematic  
21  
22 169 introduction of a complex intervention [18], and has been successfully used in a  
23  
24 170 number of studies related to service delivery improvements [19, 20]. Another  
25  
26 171 advantage of this study design is that it limits bias by randomly assigning the clinics  
27  
28 172 to the intervention in sequential order. There are key elements that require attention  
29  
30 173 with this study design including the consideration of timing of study time-points,  
31  
32 174 cluster equivalence within the setting and intervention uptake assessed by process  
33  
34 175 measures [21, 22].  
35  
36  
37  
38

39 176 The first clinic will be observed during a current standard practice lead-in period for  
40  
41 177 four weeks, then introduced into the iPROMOS intervention, while the other clinic will  
42  
43 178 continue with current standard practice and await implementation of iPROMOS. Data  
44  
45 179 collection and intervention time-points are presented Table 1.  
46  
47  
48

49 180 Table 1: Cluster stepped-wedge study design for iPROMOS  
50

| Timepoint | T1 (weeks 0-4) | T2 (weeks 4-8) | T3 (weeks 8-12) |
|-----------|----------------|----------------|-----------------|
| Clinic 1  | Control Data   | Intervention   | Intervention    |
| Clinic 2  | Control Data   | Control Data   | Intervention    |

181 This protocol was co-designed with clinicians, academics and patient  
 182 representatives. The iPROMOS intervention was informed by pre-implementation  
 183 data collected from health professionals and relevant local stakeholders (Table 2).  
 184 Reporting will follow Standards for Reporting Implementation Studies (StaRI)[23].

185 Table 2: Summary of pre-implementation information and how it informed  
 186 implementation design

| Aim                                         | Data collected                                                                                                                                                                                                                                     | Description of Findings                                                                                                                                                                                                                                                                                                                                                                                                                                    | Implementation strategies                                                                                                                                                                                                                                                                                                                                                                                                                                                       |
|---------------------------------------------|----------------------------------------------------------------------------------------------------------------------------------------------------------------------------------------------------------------------------------------------------|------------------------------------------------------------------------------------------------------------------------------------------------------------------------------------------------------------------------------------------------------------------------------------------------------------------------------------------------------------------------------------------------------------------------------------------------------------|---------------------------------------------------------------------------------------------------------------------------------------------------------------------------------------------------------------------------------------------------------------------------------------------------------------------------------------------------------------------------------------------------------------------------------------------------------------------------------|
| To engage health professionals and patients | Physical environment mapped<br><br>Field notes<br><br>Focus groups/interviews with multi-disciplinary team members and patient representatives of enablers and barriers<br><br>Staff survey of knowledge, PROMs data format, enablers and barriers | The physical environment is busy but movement of patients, staff and medical records is established<br><br>There are a number of established treatment pathways for patient care based on disease group, stage of disease and treatment regimen<br><br>Previous interventions have been unsuccessful due to a lack of collaboration with staff and patients<br><br>Knowledge about PROMs and current evidence is different across health discipline groups | Touch-screen computers will be positioned for easy access by patients as they enter the clinic area<br><br>PROMs reports will be made available to staff prior to patient encounter<br><br>PROMs data entry design, and equipment was sourced in collaboration with consumer representatives<br><br>Information resources were developed in collaboration with staff and patient representatives, including posters, information sheets, staff brochures and inservice material |

|                                              |                                                                                                                                                     |                                                                                                                                                                                                                                                                                                                                                                                                                                                                                                                                                                                                             |                                                                                                                                                                                                                                                                                                                                                                                                            |
|----------------------------------------------|-----------------------------------------------------------------------------------------------------------------------------------------------------|-------------------------------------------------------------------------------------------------------------------------------------------------------------------------------------------------------------------------------------------------------------------------------------------------------------------------------------------------------------------------------------------------------------------------------------------------------------------------------------------------------------------------------------------------------------------------------------------------------------|------------------------------------------------------------------------------------------------------------------------------------------------------------------------------------------------------------------------------------------------------------------------------------------------------------------------------------------------------------------------------------------------------------|
| <p>To effectively incorporate technology</p> | <p>Field notes</p> <p>Map of Information Technology Systems that interact with patient care, including the physical environment</p>                 | <p>Many electronic medical records systems interact with patients and staff but not with each other. If PROMs data becomes a report it can be stored as such in the patient's medical record</p> <p>Paper-based reports can be more easily integrated into patient records</p> <p>Development of a system specific for each individual health service is expensive and time consuming. It is unclear whether this would be integrated into current IT systems, or become another log on for staff, which reduces their likelihood of engagement. No ready-made system could be identified for purchase.</p> | <p>A simple electronic data capture system (REDCap) will be used to collect PROMs data and generate reports. A simple set-up provides the flexibility needed for integration and implementation whilst ensuring the fidelity of the intervention.</p> <p>Developing/funding a more sophisticated platform for collecting PROMs from patients can be informed by the successful implementation process.</p> |
| <p>To manage and respond to PROMs data</p>   | <p>Focus groups/interviews and field notes to map referral and communication pathways</p> <p>iPARIHS Context assessments of clinical areas [15]</p> | <p>Reports can inform referrals, in the format of documentation in the medical record, verbal communication or by email. The best approach needs to be identified with the relevant clinical team/area.</p> <p>Symptom assessment by clinicians uses CTCAE<sup>4</sup> v4.0 as standard practice</p> <p>Allied health and specialist nurse roles are in place for management of specific</p>                                                                                                                                                                                                                | <p>Alerts criteria will be generated directly to the appropriate specialist nurse and allied health team member to integrate into their practice.</p> <p>PROMs reports will be used to inform assessment and clinical decision making</p>                                                                                                                                                                  |

<sup>4</sup> CTCAE is the Common Terminology Criteria for Adverse Events, developed by the US Department of Health and Human Services which offers provides universal assessment and grading of symptoms of disease and treatment

|  |  |          |  |
|--|--|----------|--|
|  |  | symptoms |  |
|--|--|----------|--|

187 *Patient and Public Statement:*

188 Consumer representatives within the health services, and on a research advisory  
189 group were approached to discuss the project. They confirmed a need for patient  
190 self-reporting of symptoms that are integrated into routine care. Their reports would  
191 need to be available to staff so that their concerns could be actioned. During the  
192 development of the protocol, consumer representatives were involved in the  
193 development of patient resources and collection of pre-implementation data. They  
194 also assessed the burden of the intervention on patients

195 Results will be disseminated on information boards in the health service, and  
196 reported back to Consumer Representative forums.

197 *Key features of the intervention:*

198 Based on the published evidence [5] and data from local clinicians as summarised in  
199 Table 2, the PRO-CTCAE was selected as the PROM to be implemented, as it was  
200 developed to extend an assessment by clinicians using the CTCAE [24], and has  
201 been demonstrated to provide significant benefits for patient care and outcomes [9].  
202 This PROM allows patients to report how much they experience each symptom, and  
203 the impact on their daily activities, on a five-point Likert scale (ranging from 'none' to  
204 'very much'). The core set of questions includes anorexia, constipation, dyspnoea,  
205 diarrhoea, fatigue, nausea, pain, sensory neuropathy, vomiting, cough, low mood  
206 and anxiety. Basch's (2016) study used a weekly completion schedule on an app  
207 with alerts sent to clinicians in real-time [5]. However, use of apps for patient  
208 reporting was not compatible with the health service's patient confidentiality policy.

1  
2  
3 209 The intervention was adapted to include PROM reporting only during scheduled  
4  
5 210 attendances for outpatient clinic appointments. Thus, reporting to clinicians will occur  
6  
7 211 in line with existing clinic visits, which may be weekly or less frequently depending on  
8  
9 212 cancer diagnosis, stage and treatment regimen. PROMs reports will be made  
10  
11 213 available for health professionals to view and respond to. This could include referring  
12  
13 214 the patient to allied health or supportive care, counselling, or additional  
14  
15 215 pharmacological support (e.g. adjusting pain medications). PROMS will be added in  
16  
17 216 paper format to the patient chart, and in keeping with local practice, will be scanned  
18  
19  
20 217 into the electronic medical record at a later date.  
21  
22

23 218 In summary, the iPROMOS intervention consists of, a) patients self-reporting  
24  
25 219 symptoms (PRO-CTCAE PROM) using a touchscreen computer with data captured  
26  
27 220 on a custom-built REDCap database; b) reports of this information are generated in  
28  
29 221 real time; c) these reports are available to all healthcare team members and filed in  
30  
31 222 the patients' medical record; and, d) a copy of the report is also provided to the  
32  
33 223 patient. Usual care is clinician assessment of symptoms without the additional use of  
34  
35 224 a PROM.  
36  
37  
38

39 225 In the co-design process, using the broader research evidence, investigated to  
40  
41 226 support clinician's recommendations, a reported symptom of grade 2 or higher for  
42  
43 227 nausea, vomiting or anorexia, and grade 3 for all other symptoms is considered  
44  
45 228 significant [5]. If there is an increase in symptoms greater than 2 points from the  
46  
47 229 previous visit, this will also trigger a referral by established pathways to the relevant  
48  
49  
50 230 allied health professional.  
51  
52

53 231 *Setting of the implementation:*  
54  
55  
56  
57  
58  
59  
60

1  
2  
3 232 This project will be conducted in a tertiary teaching/quaternary referral hospital-  
4  
5 233 located in South-East Queensland, Australia. The health service for this centre is  
6  
7 234 the largest in Australia, with the oncology outpatients' department running up to 14  
8  
9 235 clinics in one day. Each of these clinics are oncologist specific, providing service for  
10  
11 236 treatment, surveillance and follow-up for the patients in their care.  
12  
13

14  
15 237 Contextual pre-implementation information has revealed key factors for successful  
16  
17 238 integration of the intervention (Table 2). Most importantly, the intervention needs to  
18  
19 239 engage all members of the multi-disciplinary team and the staff who will have access  
20  
21 240 to the PROM information to address symptoms, disease management and  
22  
23 241 treatment. To make this likely, the facilitator will aim to integrate the PROM collection  
24  
25 242 and reporting as much as possible into the existing workflow processes already in  
26  
27 243 place at the clinic. Evidence shows that workflows differ greatly between hospitals  
28  
29 244 and even within clinics in a hospital, and that staff are reluctant to change anything  
30  
31 245 that interrupts established practice, given the very complex environment they are  
32  
33 246 managing [25]. They are only willing to take on a new intervention when the benefits  
34  
35 247 and processes for patient care are tangible and clear. For successful  
36  
37 248 implementation, it has been identified that it is necessary to integrate with existing  
38  
39 249 patient care pathways and technological infrastructure, rather than impose another  
40  
41 250 layer, which would likely be met with resistance [25].  
42  
43  
44  
45

46 251 *Participants:*  
47  
48

49 252 This study will collect data from two main groups of participants: a) patients; and b)  
50  
51 253 the clinicians caring for them.  
52  
53  
54  
55  
56  
57  
58  
59  
60



1  
2  
3 254 a) *Patients* who attend the randomised medical oncology outpatients' clinics for  
4  
5 255 treatment, medical review, active surveillance, or routine follow-up, with  
6  
7 256 sufficient English to read the questionnaires. Patients with significant  
8  
9 257 cognitive impairment, visual difficulties, or from a non-English speaking  
10  
11 258 background who might have difficulty completing the forms will be excluded  
12  
13 259 from the study.

14  
15  
16  
17 260 *Patient Screening and Recruitment:* Patients attending selected clinics will be  
18  
19 261 invited to the use touchscreen computer to complete PROM information. The  
20  
21 262 first page of the PROM collection form provides a Patient Information Sheet  
22  
23 263 and Consent form. Potential participants will need to read the information and  
24  
25 264 accept to enter PROM reporting platform. If they do not wish to, they can  
26  
27 265 choose to decline. Patient information will also be visible on a poster  
28  
29 266 displayed in the clinical waiting area.

30  
31  
32  
33 267 b) *Staff* who care for these patients' including nursing and medical staff,  
34  
35 268 pharmacists, dietitians, welfare workers, social workers, psychologists,  
36  
37 269 speech therapists, physiotherapists and other allied health workers are  
38  
39 270 eligible.

40  
41  
42  
43 271 *Staff participation:* an opt-out approach to consent staff has been approved by  
44  
45 272 the ethics committee. Multidisciplinary staff will be contacted using various  
46  
47 273 communication channels, directly by the facilitator-researcher to collect pre-  
48  
49 274 implementation information, as well as through distribution of information  
50  
51 275 brochures and poster developed in collaboration with the clinical teams.

52  
53  
54  
55 276 *Methods of evaluation:*

277 *Process Measures used for implementation evaluation:*

278 Table 3: Process Measures of Implementation Evaluation

279

| Process measuring tool                                                                                                                                                                                                                                                                                                                                                          | Method of collection                                                            | Approach to analysis                                                                            |
|---------------------------------------------------------------------------------------------------------------------------------------------------------------------------------------------------------------------------------------------------------------------------------------------------------------------------------------------------------------------------------|---------------------------------------------------------------------------------|-------------------------------------------------------------------------------------------------|
| <b>Context:</b> <ol style="list-style-type: none"> <li>1. Description of factors impacting and impacted</li> <li>2. Description of barriers and enablers</li> </ol>                                                                                                                                                                                                             | Facilitator field notes and site journal                                        | Qualitative: content analysis for a structured analysis                                         |
| <b>Feasibility:</b> <ol style="list-style-type: none"> <li>1. Number of patients that approached the touchscreen computer without prompting</li> <li>2. Time taken to complete PROM by patients</li> <li>3. Time required to assist patients complete PROM</li> <li>4. Number of return completions by patients</li> <li>5. Time taken to respond to report by staff</li> </ol> | Counts<br>Data from data-capture program<br>Self-report by staff<br>Field notes | Quantitative: descriptive statistics<br>Qualitative: content analysis for a structured analysis |
| <b>Fidelity:</b> <ol style="list-style-type: none"> <li>1. Number of missing encounters by patients</li> <li>2. Number of missing case report forms</li> <li>3. Reasons for missing data</li> </ol>                                                                                                                                                                             | Counts<br>Case report form data<br>Field notes                                  | Quantitative: descriptive statistics<br>Qualitative: content analysis for a structured analysis |
| <b>Reach:</b> <ol style="list-style-type: none"> <li>1. Number of staff that answered "yes" to whether they knew about the implementation</li> <li>2. Number of staff that stated that required</li> </ol>                                                                                                                                                                      | Counts<br>Case report form data<br>Field notes                                  | Quantitative: descriptive statistics<br>Qualitative: content analysis for a structured analysis |

|                                                                                                                                                 |  |  |
|-------------------------------------------------------------------------------------------------------------------------------------------------|--|--|
| <p>education about PROMs</p> <p>3. Number of staff that independently used PROMs report</p> <p>4. Staff groups that responded to PROMs data</p> |  |  |
|-------------------------------------------------------------------------------------------------------------------------------------------------|--|--|

280

281 In accordance with the MRC Guidelines for Complex Interventions the iterative  
 282 implementation will be evaluated using both quantitative and qualitative process  
 283 measures as described in Table 3.

284 Following the iPARIHS framework, data will be collected by the facilitator who works  
 285 closely within the context. In this protocol, the facilitator will collect and use process  
 286 measures, with protocol-specified data collected at pre-specified time-points (Table  
 287 4).

288 Plan Do Study Act Cycles (PDSA) will be performed every 21 days as an interim  
 289 data analysis to evaluate progress, and to report these findings to clinicians so that  
 290 collaborative strategies can be established that maximise implementation. The  
 291 purpose of each PDSA cycle is to summarise and reflect on the implementation  
 292 process and improve it for the next cycle [15].

293

294 *Outcomes of the implementation:*

295 Table 4: Outcomes of the implementation

| Outcome Measure                        | Method of Data Collection                                                                       | Approach to analysis                                                               |
|----------------------------------------|-------------------------------------------------------------------------------------------------|------------------------------------------------------------------------------------|
| <b>% patients completing PROM form</b> | Nominator of PROMs in electronic data capture; denominator of booking schedule of patients that | Quantitative: Descriptive Statistical Analysis; longitudinal analyses of % change. |

|                                                               |                                                                                                |                                                                                                                     |
|---------------------------------------------------------------|------------------------------------------------------------------------------------------------|---------------------------------------------------------------------------------------------------------------------|
|                                                               | attended clinic; facilitator field notes of reasons for any missing data                       | Qualitative: Content analysis                                                                                       |
| <b>% staff acknowledging PROM data</b>                        | Case report forms; facilitator field notes                                                     | Quantitative: Descriptive Statistical Analysis; longitudinal analyses of % change.<br>Qualitative: Content analysis |
| <b>% PROMs in medical record</b>                              | Communication in the medical record; completed PROMs in electronic data capture; referral data | Quantitative: Descriptive Statistical Analysis<br>Qualitative: Content analysis                                     |
| <b>Acceptability of PROM reporting for staff and patients</b> | Staff survey<br>Focus groups, interviews and field notes                                       | Quantitative: Descriptive Statistical Analysis<br>Qualitative: Content Analysis to identify themes and interpret    |

296

297 The primary outcome of interest is successful implementation, and has been  
 298 operationalised as “PROM reports are made available to clinicians in 85% of  
 299 encounters, 70% of clinicians will respond to PROM data, and of those 50% of  
 300 responses will be noted in the patients’ medical record”. This was selected as other  
 301 studies reported that clinicians and patients are satisfied at such level of service  
 302 when use is identified as feasible and acceptable [26, 27].

303 Secondary outcomes will measure patient and staff acceptance. Staff surveys will be  
 304 distributed at the end of the PROMs data collection to capture change from baseline  
 305 in staff knowledge, and identified facilitators and barriers.

306 *Outcomes of the intervention:*

307 Table 5: Outcome Measures of the Intervention

| Outcome Measure | Methods of collection | Approach to analysis |
|-----------------|-----------------------|----------------------|
|-----------------|-----------------------|----------------------|

|                                                                                         |                                                                         |                                                                                                                                          |
|-----------------------------------------------------------------------------------------|-------------------------------------------------------------------------|------------------------------------------------------------------------------------------------------------------------------------------|
| Symptoms assessment by clinicians                                                       | Medical record entries, case report forms                               | Comparison of proportion of patients with symptom assessment between intervention and control group using chi-square test                |
| Response to symptom information                                                         | Medical record entries, case report forms                               | Proportion of patients referred for supportive care interventions compared between intervention and control groups using chi-square test |
| Change in symptom reporting and responding from pre-intervention to during intervention | Medical record entries, case report forms, PROM electronic data capture | Proportion of patients before to during intervention period using chi-square analysis and process control analysis                       |
| Presentations to the emergency department                                               | Medical record entries                                                  | Proportion of patients before to during intervention period using chi-square analysis and process control analysis                       |
| Hospital admissions                                                                     | Medical record entries                                                  | Proportion of patients before to during intervention period using chi-square analysis and process control analysis                       |

308

309 The primary outcome measure of the intervention will be counts of health  
 310 professional notes in the patients' chart about a symptom being of concern (for  
 311 example pain). As well as this, the response to such symptoms will be recorded (e.g.  
 312 referral to pain specialist).

313 Secondary outcomes will be an improvement in patient quality of life, presenting as a  
 314 clinically significant reduction in measured symptoms. More detailed explanation of  
 315 outcome measures is provided in Table 5.

316 *Sample size:*

1  
2  
3 317 To obtain an estimate of a minimal number of observations that should be included  
4  
5 318 in each cluster in this study, Berry et al's (2014) results were used [28]. These  
6  
7 319 researchers identified that a PROMs intervention increased symptom detection by  
8  
9 320 10%. Using these findings, and 80% power, given a baseline detection level of 0.75,  
10  
11 321 500 participant encounters would be needed to show improvement by 10% or more.

12  
13  
14  
15 322 *Methods of Analysis:*

16  
17  
18 323 *Quantitative analyses:* Quantitative measures have been designed for the process  
19  
20 324 measures of implementation evaluation, the outcome measures of the  
21  
22 325 implementation and the outcome measures of the intervention. Descriptive statistics  
23  
24 326 including counts, frequencies and proportions will be used to summarize data  
25  
26 327 collected. Other statistical analyses to be used will include chi-square analysis for  
27  
28 328 comparing proportions, linear mixed models for longitudinal analyses, and statistical  
29  
30 329 control process analysis to identify trends over time.

31  
32  
33 330 Data from both clusters will be analysed using inverse variance weighting so that the  
34  
35 331 difference can be estimated for all patient encounters. This analysis can be used to  
36  
37 332 adjust for cancer types, or clustering by clinicians [29]. This analysis will provide a  
38  
39 333 measure of the intra-cluster effect, which can then be used for power calculations in  
40  
41 334 future larger studies [30].

42  
43  
44  
45 335 *Qualitative data:*

46  
47  
48 336 The facilitator site journal will be used to record observations, and will be content  
49  
50 337 analysed to identify key themes, as a part of each PDSA cycle every 21 days.

51  
52  
53 338 The analysis of the facilitator site field notes will be used to triangulate other  
54  
55 339 research findings highlighting aspects in need of further investigation. The function

1  
2  
3 340 of field notes is to identify processes in a given situation and describe how  
4  
5 341 participants contribute to, and impact, these [31]. Extracted data will be interpreted in  
6  
7 342 keeping with Miles and Huberman's approach (2014) using field notes to inform the  
8  
9 343 content analysis to "decide what things mean, noting regularities, patterns,  
10  
11 344 explanation, possible configurations, causal flows and propositions"[32] .  
12  
13

#### 14 345 *Data monitoring*

15  
16  
17  
18 346 Data monitoring will ascertain high data quality, ensure rigour and mitigate biases.  
19  
20

21 347 Data monitoring will be done through three processes:  
22  
23

- 24 348 1. Quantitative data will be double entered for a random sample of 10% records,  
25  
26 349 and all records will be double entered should the error rate be greater than  
27  
28 350 5%.  
29  
30
- 31 351 2. Monthly meetings with expert facilitators who are not involved with the project  
32  
33 352 to reflect on the implementation and evaluation of the project.  
34
- 35 353 3. Supervision and oversight by the study team not directly involved in the  
36  
37 354 process of implementation.  
38  
39

#### 40 355 *Safety Reporting*

41  
42  
43  
44 356 The main purpose of the secondary outcome measures of the intervention is to  
45  
46 357 measure the safety of using this implementation approach. A potential safety issue  
47  
48 358 is that when patients complete the PROMs they expect that staff will act on that  
49  
50 359 information. If the implementation is not successful, staff may not do this in a timely  
51  
52 360 fashion or at all, and patients who report symptoms may not receive suitable  
53  
54 361 treatment. Any such issues where a PROMs report was not acted on will be noted  
55  
56  
57  
58  
59  
60

1  
2  
3 362 and described using the data collection tools for the project. The facilitator will raise  
4  
5 363 any issues where patient safety is at risk.  
6

7  
8 364 *Ethical Considerations*  
9

10 365 This project has received ethical approval from the Royal Brisbane and Women's  
11  
12 366 Hospital Human Research Ethics Committee number HREC/16/QRBW/100.  
13  
14

15  
16 367 *Discussion:*  
17

18  
19 368 This study proposes that successful implementation of PROMs requires  
20  
21 369 sophisticated attention to the local clinical setting and existing clinical workflows, and  
22  
23 370 can overcome barriers previously experienced in other settings by following a pre-  
24  
25 371 specified implementation approach with an experienced facilitator. It is important to  
26  
27 372 investigate implementation strategies as clinical trials have demonstrated significant  
28  
29 373 benefits for patients, but also reported the difficulties of using PROMs in complex  
30  
31 374 health systems outside the highly structured context of a clinical trial. Systematic  
32  
33 375 reviews recommend a structured implementation approach that takes into account  
34  
35 376 the many elements present in the health system into which PROMs are introduced.  
36  
37 377 The use of the iPARIHS framework with the MRC Guidelines for Implementation of  
38  
39 378 Complex Interventions, built upon the work of ISOQOL, offers an implementation  
40  
41 379 strategy that addresses the issues identified in the research to date. This study offers  
42  
43 380 an opportunity to scientifically measure implementation, potentially rapidly implement  
44  
45 381 PROMs into clinical practice and to inform future research and clinical practice.  
46  
47  
48  
49

50 382 Trial Status: Opened on 25 March 2018 and will continue until 12 months after the  
51  
52 383 last PROMs reporting encounter.  
53  
54

55  
56 384 *References:*  
57  
58  
59  
60



- 1  
2  
3 385 1. Coons, S.J., et al., *Recommendations on evidence needed to support*  
4  
5 386 *measurement equivalence between electronic and paper-based patient-*  
6  
7 387 *reported outcome (PRO) measures: ISPOR ePRO Good Research Practices*  
8  
9 388 *Task Force report*. Value Health, 2009. **12**(4): p. 419-29.
- 11 389 2. Revicki, D.A., et al., *Recommendations on health-related quality of life*  
12  
13 390 *research to support labeling and promotional claims in the United States*. Qual  
14  
15 391 Life Res, 2000. **9**(8): p. 887-900.
- 17 392 3. Antunes, B., R. Harding, and I.J. Higginson, *Implementing patient-reported*  
18  
19 393 *outcome measures in palliative care clinical practice: a systematic review of*  
20  
21 394 *facilitators and barriers*. Palliat Med, 2014. **28**(2): p. 158-75.
- 23 395 4. Sharma, P., et al., *Evaluation of point-of-care PRO assessment in clinic*  
24  
25 396 *settings: integration, parallel-forms reliability, and patient acceptability of*  
26  
27 397 *electronic QOL measures during clinic visits*. Qual Life Res, 2016. **25**(3): p.  
28  
29 398 575-83.
- 31 399 5. Basch, E., et al., *Symptom Monitoring With Patient-Reported Outcomes*  
32  
33 400 *During Routine Cancer Treatment: A Randomized Controlled Trial*. J Clin  
34  
35 401 Oncol, 2016. **34**(6): p. 557-65.
- 37 402 6. Velikova, G., et al., *Patients report improvements in continuity of care when*  
38  
39 403 *quality of life assessments are used routinely in oncology practice: secondary*  
40  
41 404 *outcomes of a randomised controlled trial*. Eur J Cancer, 2010. **46**(13): p.  
42  
43 405 2381-8.
- 45 406 7. Klinkhammer-Schalke, M., et al., *Direct improvement of quality of life using a*  
46  
47 407 *tailored quality of life diagnosis and therapy pathway: randomised trial in 200*  
48  
49 408 *women with breast cancer*. Br J Cancer, 2012. **106**(5): p. 826-38.

- 1  
2  
3 409 8. Denis, F., et al., *Randomized Trial Comparing a Web-Mediated Follow-up*  
4 *With Routine Surveillance in Lung Cancer Patients*. J Natl Cancer Inst, 2017.  
5 410  
6  
7 411 **109**(9).  
8  
9 412 9. Basch, E., et al., *Overall Survival Results of a Trial Assessing Patient-*  
10 *Reported Outcomes for Symptom Monitoring During Routine Cancer*  
11 *Treatment*. Jama, 2017. **318**(2): p. 197-198.  
12 413  
13 414  
14  
15 415 10. Porter, I., et al., *Framework and guidance for implementing patient-reported*  
16 *outcomes in clinical practice: evidence, challenges and opportunities*. J Comp  
17 *Eff Res*, 2016. **5**(5): p. 507-19.  
18 416  
19 417  
20 418 11. Duncan, E.A. and J. Murray, *The barriers and facilitators to routine outcome*  
21 *measurement by allied health professionals in practice: a systematic review*.  
22 *BMC Health Serv Res*, 2012. **12**: p. 96.  
23 419  
24 420  
25 421 12. Snyder, C.F., et al., *Implementing patient-reported outcomes assessment in*  
26 *clinical practice: a review of the options and considerations*. Qual Life Res,  
27 422  
28 423 2012. **21**(8): p. 1305-14.  
29 424  
30 425 13. Craig, P. and M. Petticrew, *Developing and evaluating complex interventions:*  
31 *reflections on the 2008 MRC guidance*. Int J Nurs Stud, 2013. **50**(5): p. 585-7.  
32 426  
33 427 14. Nilsen, P., *Making sense of implementation theories, models and frameworks*.  
34 *Implement Sci*, 2015. **10**: p. 53.  
35 428  
36 429 15. Harvey, G. and A. Kitson, *PARIHS revisited: from heuristic to integrated*  
37 *framework for the successful implementation of knowledge into practice*.  
38 *Implement Sci*, 2016. **11**: p. 33.  
39 430  
40 431 16. Baskerville, N.B., C. Liddy, and W. Hogg, *Systematic review and meta-*  
41 *analysis of practice facilitation within primary care settings*. Ann Fam Med,  
42 432  
43 433 2012. **10**(1): p. 63-74.  
44  
45  
46  
47  
48  
49  
50  
51  
52  
53  
54  
55  
56  
57  
58  
59  
60

- 1  
2  
3 434 17. Moore, G.F., et al., *Process evaluation of complex interventions: Medical*  
4  
5 435 *Research Council guidance*. Bmj, 2015. **350**: p. h1258.  
6  
7 436 18. Hemming, K. and A. Girling, *A menu-driven facility for power and detectable-*  
8  
9 437 *difference calculations in stepped-wedge cluster-randomized trials*. Stata  
10  
11 438 Journal, 2014. **14**(2): p. 363-380.  
12  
13 439 19. Fuller, C., et al., *The Feedback Intervention Trial (FIT)--improving hand-*  
14  
15 440 *hygiene compliance in UK healthcare workers: a stepped wedge cluster*  
16  
17 441 *randomised controlled trial*. PLoS One, 2012. **7**(10): p. e41617.  
18  
19  
20 442 20. Campbell, M., et al., *Framework for design and evaluation of complex*  
21  
22 443 *interventions to improve health*. Bmj, 2000. **321**(7262): p. 694-6.  
23  
24 444 21. Hughes, J.P., T.S. Granston, and P.J. Heagerty, *Current issues in the design*  
25  
26 445 *and analysis of stepped wedge trials*. Contemp Clin Trials, 2015. **45**(Pt A): p.  
27  
28 446 55-60.  
29  
30  
31 447 22. Liao, X., X. Zhou, and D. Spiegelman, *A note on "Design and analysis of*  
32  
33 448 *stepped wedge cluster randomized trials"*. Contemp Clin Trials, 2015. **45**(Pt  
34  
35 449 B): p. 338-339.  
36  
37 450 23. Pinnock, H., et al., *Standards for Reporting Implementation Studies (StaRI)*  
38  
39 451 *Statement*. Bmj, 2017. **356**: p. i6795.  
40  
41  
42 452 24. Health, N.I.o., *Common Terminology Criteria for Adverse Events v4.0*  
43  
44 453 *(CTCAE)*. US Department of health and human services, May 28 2009. 2009.  
45  
46 454 25. Braithwaite, J., *Changing how we think about healthcare improvement*. Bmj,  
47  
48 455 2018. **361**: p. k2014.  
49  
50 456 26. Bainbridge, D., et al., *Multidisciplinary health care professionals' perceptions*  
51  
52 457 *of the use and utility of a symptom assessment system for oncology patients*.  
53  
54 458 J Oncol Pract, 2011. **7**(1): p. 19-23.  
55  
56  
57  
58  
59  
60

- 1  
2  
3 459 27. Detmar, S.B., et al., *Health-related quality-of-life assessments and patient-*  
4 *physician communication: a randomized controlled trial.* *Jama*, 2002. **288**(23):  
5 460  
6  
7 461 p. 3027-34.  
8  
9 462 28. Berry, D.L., et al., *The electronic self report assessment and intervention for*  
10 *cancer: promoting patient verbal reporting of symptom and quality of life*  
11 *issues in a randomized controlled trial.* *BMC Cancer*, 2014. **14**: p. 513.  
12 463  
13 464  
14  
15 465 29. Hooper, R., et al., *Sample size calculation for stepped wedge and other*  
16 *longitudinal cluster randomised trials.* *Stat Med*, 2016. **35**(26): p. 4718-4728.  
17 466  
18  
19 467 30. Grayling, M.J., J.M. Wason, and A.P. Mander, *Stepped wedge cluster*  
20 *randomized controlled trial designs: a review of reporting quality and design*  
21 *features.* *Trials*, 2017. **18**(1): p. 33.  
22 468  
23  
24 469  
25  
26 470 31. Silverman, D. *Interpreting Qualitative Data.* 2006. Lond: Sage.  
27  
28 471 32. Miles, M. and A. Huberman, *Qualitative Data Analysis: A Methods*  
29 *Sourcebook.* 2014, California: Sage.  
30 472  
31  
32  
33  
34 473  
35  
36  
37 474 Author Affiliations  
38  
39  
40  
41 475 This protocol was developed as a component of a PhD project. The student and  
42  
43 476 supervisory team participated in the implementation science based approach of  
44  
45 477 protocol development.  
46  
47 478 Natasha Roberts, Queensland University of Technology, Kelvin Grove, QLD,  
48  
49 479 Australia, and Royal Brisbane and Women's Hospital, Herston, QLD, Australia  
50  
51  
52 480 Monika Janda, Centre for Health Services Research, The University of Queensland,  
53  
54 481 Woolloongabba, QLD, Australia  
55  
56  
57  
58  
59  
60

1  
2  
3 482 Alison Mudge, Department of Internal Medicine, Royal Brisbane and Women's  
4  
5 483 Hospital, Herston, QLD, Australia  
6  
7

8 484 Kimberly Alexander, School of Nursing, Queensland University of Technology, Kelvin  
9  
10 485 Grove, QLD, Australia  
11  
12

13 486 David Wyld, Cancer Care Services, Royal Brisbane and Women's Hospital, Herston,  
14  
15 487 QLD, Australia  
16  
17

18  
19 488 Contributorship statement:  
20  
21

22 489 NR and MJ drafted the protocol for this publication. AM contributed significantly to  
23  
24 490 the drafting of this publication, particularly with expertise in implementation science  
25  
26 491 and multi-disciplinary care. KA contributed expertise regarding nursing care,  
27  
28 492 symptom management and PROMs. DW contributed expertise regarding specialist  
29  
30 493 medical care and health services management.  
31  
32

33  
34 494 Acknowledgements  
35  
36

37 495 I would like to acknowledge supervision and knowledge of my PhD supervisors MJ,  
38  
39 496 KA and DW, and ongoing expertise and support from AM. Appreciation also goes to  
40  
41 497 the Metro North Research Unit, and the Queensland University of Technology.  
42  
43  
44

45 498 Thanks must go to the staff of the multi-disciplinary team in Cancer Care Services at  
46  
47 499 the Royal Brisbane and Women's Hospital (RBWH) who contributed their time,  
48  
49 500 knowledge and expertise to the development of this protocol, in particular, Jenni  
50  
51 501 Leutenegger, Therese Hayes and Annette Cubitt. Thanks also to the Consumer  
52  
53 502 Representatives at RBWH for their time in protocol development and pre-  
54  
55 503 implementation data collection, in particular Gary Power and Anita McGrath who  
56  
57  
58  
59  
60

1  
2  
3 504 gave their time contributing to the development of patient education and patient  
4  
5 505 information sheets.  
6  
7

8 506 Funding:  
9

10  
11 507 This work is supported by the Royal Brisbane and Women's Hospital Postgraduate  
12  
13 508 Scholarship and a QUT APA Scholarship. Computer equipment and infrastructure is  
14  
15  
16 509 funded by the "Susan Sudak Day to End Cancers" Diamond Care Grant.  
17  
18

19 510 Competing interests statement:  
20

21  
22 511 There are none to declare  
23  
24

25  
26 512  
27

28  
29 513  
30

31  
32 514  
33  
34  
35  
36  
37  
38  
39  
40  
41  
42  
43  
44  
45  
46  
47  
48  
49  
50  
51  
52  
53  
54  
55  
56  
57  
58  
59  
60

# BMJ Open

## The iPROMOS Protocol: A Stepped-Wedge Study to Implement Routine Patient Reported Outcomes in a Medical Oncology Outpatient Setting

|                                 |                                                                                                                                                                                                                                                                                                                                                                                                                                                                                                                                                                                                                           |
|---------------------------------|---------------------------------------------------------------------------------------------------------------------------------------------------------------------------------------------------------------------------------------------------------------------------------------------------------------------------------------------------------------------------------------------------------------------------------------------------------------------------------------------------------------------------------------------------------------------------------------------------------------------------|
| Journal:                        | <i>BMJ Open</i>                                                                                                                                                                                                                                                                                                                                                                                                                                                                                                                                                                                                           |
| Manuscript ID                   | bmjopen-2018-027046.R1                                                                                                                                                                                                                                                                                                                                                                                                                                                                                                                                                                                                    |
| Article Type:                   | Protocol                                                                                                                                                                                                                                                                                                                                                                                                                                                                                                                                                                                                                  |
| Date Submitted by the Author:   | 26-Nov-2018                                                                                                                                                                                                                                                                                                                                                                                                                                                                                                                                                                                                               |
| Complete List of Authors:       | Roberts, Natasha; Queensland University of Technology Faculty of Health, ; Royal Brisbane and Women's Hospital, Mudge, Alison; Royal Brisbane and Women's Hospital, Department of Internal Medicine and Aged Care<br>Alexander, Kim; Queensland University of Technology Faculty of Health, School of Nursing<br>Wyld, David; Royal Brisbane and Women's Hospital, Cancer Care Services<br>Janda, Monika; University of Queensland, Centre of Health Services Research, Faculty of Medicine; Queensland University of Technology, School of Public Health and Social Work, Institute for Health and Biomedical Innovation |
| <b>Primary Subject Heading</b>: | Oncology                                                                                                                                                                                                                                                                                                                                                                                                                                                                                                                                                                                                                  |
| Secondary Subject Heading:      | Health services research, Oncology, Patient-centred medicine, Evidence based practice                                                                                                                                                                                                                                                                                                                                                                                                                                                                                                                                     |
| Keywords:                       | PROMs, implementation, complex intervention, PRO-CTCAE, iPARIHS                                                                                                                                                                                                                                                                                                                                                                                                                                                                                                                                                           |
|                                 |                                                                                                                                                                                                                                                                                                                                                                                                                                                                                                                                                                                                                           |

SCHOLARONE™  
Manuscripts

1  
2  
3  
4 1 **The iPROMOS Protocol: A Stepped-Wedge Study to**  
5  
6  
7 2 **Implement Routine Patient Reported Outcomes in a**  
8  
9  
10 3 **Medical Oncology Outpatient Setting**  
11  
12  
13  
14 4

15  
16 5 Natasha A Roberts<sup>1,2</sup>

17  
18 6 n6.roberts@hdr.qut.edu.au

19  
20  
21 7 Cancer Care Services

22  
23 8 Royal Brisbane and Women's Hospital,

24  
25 9 QLD, Australia

26  
27  
28  
29  
30 11 School of Public Health and Social Work,

31  
32 12 Queensland University of Technology,

33  
34 13 Musk Avenue, Kelvin Grove, QLD, 4059

35  
36  
37  
38  
39 15 Alison Mudge<sup>1,2</sup>

40  
41 16 Alison.mudge@health.qld.gov.au

42  
43 17 Department of Internal Medicine and Aged Care

44  
45  
46 18 Royal Brisbane and Women's Hospital

47  
48 19 QLD, Australia

49  
50  
51 20 School of Public Health and Social Work,

52  
53 21 Queensland University of Technology,

54  
55  
56  
57  
58  
59  
60

---



1  
2  
3 22 Musk Avenue, Kelvin Grove, QLD, 4059  
4  
5  
6 23  
7

8 24 Kimberly Alexander<sup>1</sup>  
9

10 25 k.alexander@qut.edu.au  
11

12 26 School of Nursing  
13

14 27 Queensland University of Technology  
15

16 28 Musk Avenue, QLD, 4059  
17  
18  
19  
20 29

21 30 David Wyld<sup>1,3</sup>  
22

23 31 david.wyld@health.qld.gov.au  
24  
25

26 32 Cancer Care Services  
27

28 33 Royal Brisbane and Women's Hospital  
29

30 34 QLD, Australia  
31  
32  
33 35

34 36 School of Medicine,  
35  
36

37 37 University of Queensland, QLD, Australia  
38  
39  
40 38

41 39 Monika Janda<sup>1,3</sup>  
42

43 40 m.janda@uq.edu.au  
44  
45

46 41 Centre for Health Services Research,  
47  
48

49 42 The University of Queensland, QLD, Australia  
50  
51  
52 43  
53  
54  
55  
56  
57  
58  
59  
60

---

1  
2  
3 44 School of Public Health and Social Work,

4  
5 45 Queensland University of Technology,

6  
7 46 QLD, Australia

8  
9 47 Correspondence:

10  
11 48 Natasha A Roberts

12  
13 49 N6.roberts@hdr.qut.edu.au

14  
15 50 1. Queensland University of Technology, QLD, Australia

16  
17 51 2. Royal Brisbane and Women's Hospital, QLD, Australia

18  
19 52 3. The University of Queensland, QLD Australia

1  
2  
3 54 Abstract:  
4

5 55 Introduction: Patient Reported Outcomes (PROMs) are data capture tools that collect  
6  
7  
8 56 information directly from patients. Several large research studies provide evidence  
9  
10 57 that use of PROMs in routine care provides benefits to mortality and morbidity  
11  
12 58 outcomes in medical oncology patients. Despite this, implementation of PROMs in  
13  
14  
15 59 daily clinical routine is slow and challenging.  
16

17  
18 60 Methods and Analysis: This study will use a stepped-wedge design to assess the  
19  
20 61 implementation of a PROM intervention in highly frequented medical oncology  
21  
22 62 outpatient clinics. During a lead-in period of four weeks, control data will be  
23  
24 63 collected. The intervention will then be implemented for four weeks in Clinic 1  
25  
26 64 initially, then in Clinic 2 for another four weeks. 500 patient encounters will be  
27  
28 65 measured over the 12 weeks in total. The process of implementation will be informed  
29  
30 66 and evaluated using the Medical Research Council (MRC) Guidelines for  
31  
32 67 Implementing Complex Interventions. The study will be guided by the iPARIHS  
33  
34 68 framework approach to implementation. The intervention and implementation  
35  
36 69 outcomes will be measured using qualitative and quantitative data.  
37  
38  
39  
40

41  
42 70 Ethics and Dissemination: Ethical approval has been obtained, approval number  
43  
44 71 HREC/16/QRBW/100 by the Royal Brisbane and Women's Hospital Human  
45  
46 72 Research Ethics Committee. Results will be disseminated in peer reviewed journals  
47  
48 73 and at scientific meetings.  
49  
50

51  
52 74 Trial Registration Number: Australian New Zealand Clinical Trials Registry  
53  
54 75 (ANZCTR): ACTRN12618000398202.  
55  
56  
57

58 76  
59  
60

## 77 Article Summary:

## 78 Strengths and limitations of this study

## 79 Limitations:

- 80 • One non-blinded researcher will implement the intervention, collect and  
81 analyse the data.
- 82 • Response bias and social desirability bias (of both health professionals and  
83 patients that choose to participate)
- 84 • Bias by the Hawthorne Effect whereby clinics being observed during the pre-  
85 implementation phase may start to change practice.

## 86 Strengths

- 87 • A stepped-wedge design ensures an incremental implementation into clinical  
88 practice.
- 89 • Prospective use of an implementation framework will make sure that enablers  
90 and barriers in the setting are collected and reported allowing the findings  
91 from this study to inform future integration of PROMs into routine clinical care.

92

93

1  
2  
3 95 Introduction:  
4  
5

6 96 *What are Patient Reported Outcome Measures (PROMs)?*  
7  
8  
9

10 97 The Federal Drug Administration (FDA) defines PROMs as “any report of the status  
11  
12 98 of a patient’s health condition that comes directly from the patient, without  
13  
14 99 interpretation of the patient’s response by a clinician or anyone else” [1]. Revicki et al  
15  
16  
17 100 (2000) describe PROMs as validated self-reporting assessment tools that capture  
18  
19 101 the patient experience [2]. PROMs have been extensively evaluated for their  
20  
21 102 sensitivity, specificity, overall accuracy and predictive value. They are now regarded  
22  
23 103 to have excellent precision, similar to many other widely-used clinical assessment  
24  
25 104 tools including pathological tests or medical imaging reports [3]. PROMs can provide  
26  
27 105 an overview of a patient’s physical, emotional, functional or overall health status, or  
28  
29 106 can be used to assess specific treatment outcomes or symptoms [4].  
30  
31  
32  
33

34 107 *PROMs in clinical practice*  
35  
36  
37

38 108 PROMs are commonly used as outcome measures in research. However more  
39  
40 109 recently there is evidence that their real-time application in clinical practice can  
41  
42 110 enhance clinical interactions and improve patient experience. Several studies have  
43  
44 111 shown that using PROMs in routine care leads to improved quality of life (QOL) [3, 5]  
45  
46 112 as well as improved communication, decision-making, care planning and patient  
47  
48 113 satisfaction [6-8]. Two recent studies demonstrated improvements in patient mortality  
49  
50 114 and morbidity when technology-facilitated PROMs data collection was incorporated  
51  
52  
53 115 in oncology care [5, 9, 10].  
54  
55  
56  
57  
58  
59  
60

1  
2  
3 116 Given these evidence-based benefits, translating these findings into practice by  
4  
5 117 integrating PROMs into routine clinical care is the next required step in the  
6  
7  
8 118 implementation cycle.  
9

### 11 119 *The Complexities of Implementing PROMs into the Clinical Setting*

12  
13  
14 120 A number of systematic reviews [3, 11, 12] reported that multiple organisational,  
15  
16 121 technical and clinical factors need to be overcome before introducing PROMs. In  
17  
18 122 particular, a lack of engagement from health care professionals, concerns about the  
19  
20 123 workflow of generating and filing of PROM reports, and lack of clearly defined  
21  
22 124 approaches in how to respond to the PROM data that indicate a patient need (e.g.  
23  
24 125 elevated pain or depression) have been identified as barriers to successful  
25  
26 126 implementation. The International Society of Quality of Life (ISOQOL) advocates a  
27  
28 127 stepwise approach to implementing PROMs, and provides a User's Guide [13],  
29  
30 128 which was updated in 2018. Klinkhammer-Schalke (2014) identified that a stepwise  
31  
32 129 approach was most useful when integrating a PROM intervention into routine care,  
33  
34 130 as it allows cycles of iterative learning during the implementation [7].  
35  
36  
37  
38  
39  
40

41 131 Incorporating PROMs into clinical practice should be considered a complex  
42  
43 132 intervention, with many elements impacting on the intervention, and vice versa [14]  
44  
45 133 Given these complexities, it has been recommended to use an implementation  
46  
47 134 framework to increase the likelihood of success when aiming to integrate PROMs  
48  
49 135 into routine care [15]. Use of a framework approach can help to consider both the  
50  
51 136 processes and intended outcomes of implementation. The Promoting Action  
52  
53 137 Research in Health Services (i-PARIHS) framework appears well suited, as it  
54  
55 138 highlights elements for consideration within the context (e.g. the features of the  
56  
57 139 particular clinic in which PROMs are to be integrated), the stakeholders (e.g.  
58  
59  
60

1  
2  
3 140 patients, clinicians, administrative staff) impacted by the intervention, and the  
4  
5 141 evidence surrounding the intervention (e.g. how much do stakeholders value the new  
6  
7 142 PROM information presented to them) [16]. A unique feature of iPARIHS is that it  
8  
9 143 stresses the central importance of a facilitator, who works with the local stakeholders  
10  
11 144 to adapt the evidence-based intervention for the local context. Antune's (2014)  
12  
13 145 systematic review provided evidence for the important role of a facilitator of the  
14  
15 146 implementation process [3], with enhanced successful uptake if one was present  
16  
17 147 [17,18]. For example, Baskerville et al (2012) showed that medical practices were  
18  
19 148 2.76 more likely to adopt evidence-based guidelines when a facilitator was working  
20  
21 149 in the local context [17].  
22  
23  
24  
25  
26

27 150 Besides the implementation framework, the Medical Research Council (MRC)  
28  
29 151 Guidelines for Implementation of Complex Interventions can provide guidance on  
30  
31 152 how to best incorporate pre-specified process measure. The Guidelines "can be  
32  
33 153 used to assess fidelity and quality of implementation, clarify causal mechanisms and  
34  
35 154 identify contextual factors associated with variation in outcomes" [18]. The MRC  
36  
37 155 approach ensures active evaluation throughout the implementation, and highlights  
38  
39 156 how to mitigate the impact that the introduction of new workflows has on the context,  
40  
41 157 participants and the intervention.  
42  
43  
44  
45  
46

47 158 In summary, the aim of this implementation study is to investigate implementation of  
48  
49 159 symptom reporting PROMs system into the outpatient oncology setting. The  
50  
51 160 objective of the intervention will be to increase detection of symptoms by clinicians  
52  
53 161 using the PROMs data. The implementation objectives include the successful  
54  
55 162 engagement of clinicians to use PROMs in clinical practice, the successful use of  
56  
57  
58  
59  
60

1  
2  
3 163 technology to obtain PROMs data from patients and present reports to clinicians,  
4  
5 164 and the identification of appropriate local strategies to respond to PROM information.  
6  
7  
8

9 165 Methods and Analysis:

10  
11  
12 166 *Study design*  
13  
14  
15

16 167 This mixed-methods study will use a stepped wedge cluster design. PROMs will be  
17  
18 168 introduced sequentially into two independent clinics, and all intervention and  
19  
20 169 implementation outcomes will be prospectively evaluated. The stepped wedge  
21  
22 170 approach has been chosen as it is a pragmatic solution for the systematic  
23  
24 171 introduction of a complex intervention [19], and has been successfully used in a  
25  
26 172 number of studies related to service delivery improvements [20, 21]. Another  
27  
28 173 advantage of this study design is that it limits bias by randomly assigning the clinics  
29  
30 174 to the intervention in sequential order. There are key elements that require attention  
31  
32 175 with this study design including the consideration of timing of study time-points,  
33  
34 176 cluster equivalence within the setting and intervention uptake assessed by process  
35  
36 177 measures [22, 23].  
37  
38  
39  
40  
41

42 178 The first clinic will be observed during a current standard practice lead-in period for  
43  
44 179 four weeks, then introduced into the iPROMOS intervention, while the other clinic will  
45  
46 180 continue with current standard practice and await implementation of iPROMOS. Data  
47  
48 181 collection and intervention time-points are presented Table 1.  
49  
50  
51

52  
53 182 Table 1: Cluster stepped-wedge study design for iPROMOS  
54

| Timepoint | T1 (weeks 0-4) | T2 (weeks 4-8) | T3 (weeks 8-12) |
|-----------|----------------|----------------|-----------------|
| Clinic 1  | Control Data   | Intervention   | Intervention    |
| Clinic 2  | Control Data   | Control Data   | Intervention    |



1  
2  
3 183 This protocol was co-designed with clinicians, academics and patient  
4  
5 184 representatives. The iPROMOS intervention was informed by pre-implementation  
6  
7 185 data collected from health professionals and relevant local stakeholders (Table 2).  
8  
9  
10 186 Reporting will follow Standards for Reporting Implementation Studies (StaRI)[24].  
11  
12  
13  
14 187 Table 2: Summary of pre-implementation information and how it informed  
15  
16 188 implementation design  
17

| Aim                                         | Data collected                                                                                                                                                                                                                                                   | Description of Findings                                                                                                                                                                                                                                                                                                                                                                                                                             | Implementation strategies                                                                                                                                                                                                                                                                                                                                                                                                                                                       |
|---------------------------------------------|------------------------------------------------------------------------------------------------------------------------------------------------------------------------------------------------------------------------------------------------------------------|-----------------------------------------------------------------------------------------------------------------------------------------------------------------------------------------------------------------------------------------------------------------------------------------------------------------------------------------------------------------------------------------------------------------------------------------------------|---------------------------------------------------------------------------------------------------------------------------------------------------------------------------------------------------------------------------------------------------------------------------------------------------------------------------------------------------------------------------------------------------------------------------------------------------------------------------------|
| To engage health professionals and patients | Physical environment mapped<br><br>Field notes<br><br>Focus groups/interviews with multi-disciplinary team members and patient representatives of enablers and barriers<br><br>Staff survey of knowledge <sup>4</sup> , PROMs data format, enablers and barriers | The physical environment is busy but movement of patients, staff and medical records is established<br><br>There are many established treatment pathways for patient care based on disease group, stage of disease and treatment regimen<br><br>Previous interventions have been unsuccessful due to a lack of collaboration with staff and patients<br><br>Knowledge about PROMs and current evidence is different across health discipline groups | Touch-screen computers will be positioned for easy access by patients as they enter the clinic area<br><br>PROMs reports will be made available to staff prior to patient encounter<br><br>PROMs data entry design, and equipment was sourced in collaboration with consumer representatives<br><br>Information resources were developed in collaboration with staff and patient representatives, including posters, information sheets, staff brochures and inservice material |

<sup>4</sup> The staff survey was modelled on Rouette's (2015) assessing knowledge and perceptions about PROs, including barriers and facilitators [26]

1  
23  
4  
5  
6  
7  
8  
9  
10  
11  
12  
13  
14  
15  
16  
17  
18  
19  
20  
21  
22  
23  
24  
25  
26  
27  
28  
29  
30  
31  
32  
33  
3435  
36  
37  
38  
39  
40  
41  
42  
43  
44  
45  
46  
47  
48  
49  
50  
51  
52  
53  
5455  
56  
57  
58  
59  
60

|                                              |                                                                                                                                                     |                                                                                                                                                                                                                                                                                                                                                                                                                                                                                                                                                                                                             |                                                                                                                                                                                                                                                                                                                                                                                                            |
|----------------------------------------------|-----------------------------------------------------------------------------------------------------------------------------------------------------|-------------------------------------------------------------------------------------------------------------------------------------------------------------------------------------------------------------------------------------------------------------------------------------------------------------------------------------------------------------------------------------------------------------------------------------------------------------------------------------------------------------------------------------------------------------------------------------------------------------|------------------------------------------------------------------------------------------------------------------------------------------------------------------------------------------------------------------------------------------------------------------------------------------------------------------------------------------------------------------------------------------------------------|
| <p>To effectively incorporate technology</p> | <p>Field notes</p> <p>Map of Information Technology Systems that interact with patient care, including the physical environment</p>                 | <p>Many electronic medical records systems interact with patients and staff but not with each other. If PROMs data becomes a report it can be stored as such in the patient's medical record</p> <p>Paper-based reports can be more easily integrated into patient records</p> <p>Development of a system specific for each individual health service is expensive and time consuming. It is unclear whether this would be integrated into current IT systems, or become another log on for staff, which reduces their likelihood of engagement. No ready-made system could be identified for purchase.</p> | <p>A simple electronic data capture system (REDCap) will be used to collect PROMs data and generate reports. A simple set-up provides the flexibility needed for integration and implementation whilst ensuring the fidelity of the intervention.</p> <p>Developing/funding a more sophisticated platform for collecting PROMs from patients can be informed by the successful implementation process.</p> |
| <p>To manage and respond to PROMs data</p>   | <p>Focus groups/interviews and field notes to map referral and communication pathways</p> <p>iPARIHS Context assessments of clinical areas [15]</p> | <p>Reports can inform referrals, in the format of documentation in the medical record, verbal communication or by email. The best approach needs to be identified with the relevant clinical team/area.</p> <p>Symptom assessment by clinicians uses CTCAE<sup>5</sup> v4.0 as standard practice</p> <p>Allied health and specialist nurse roles are in place for</p>                                                                                                                                                                                                                                       | <p>Alerts criteria will be generated directly to the appropriate specialist nurse and allied health team member to integrate into their practice.</p> <p>PROMs reports will be used to inform assessment and clinical decision making</p>                                                                                                                                                                  |

<sup>5</sup> CTCAE is the Common Terminology Criteria for Adverse Events, developed by the US Department of Health and Human Services which offers provides universal assessment and grading of symptoms of disease and treatment

|  |  |                                 |  |
|--|--|---------------------------------|--|
|  |  | management of specific symptoms |  |
|--|--|---------------------------------|--|

189 *Patient and Public Statement:*

190 Consumer representatives within the health services, and on a research advisory  
 191 group were approached to discuss the project. They confirmed a need for patient  
 192 self-reporting of symptoms that are integrated into routine care. Their reports would  
 193 need to be available to staff so that their concerns could be actioned. During the  
 194 development of the protocol, consumer representatives were involved in the  
 195 development of patient resources and collection of pre-implementation data. They  
 196 also assessed the burden of the intervention on patients

197 Results will be disseminated on information boards in the health service, and  
 198 reported back to Consumer Representative forums.

199 *Key features of the intervention:*

200 Based on the published evidence [5] and data from local clinicians as summarised in  
 201 Table 2, the PRO-CTCAE<sup>6</sup> was selected as the PROM to be implemented, as it was  
 202 developed to extend an assessment by clinicians using the CTCAE [25], and has  
 203 been demonstrated to provide significant benefits for patient care and outcomes [10].  
 204 This PROM allows patients to report how much they experience each symptom, and  
 205 the impact on their daily activities, on a five-point Likert scale (ranging from 'none' to

---

<sup>6</sup> PRO-CTCAE is a validated (119 of 124 items met at least 1 construct validity criterion) symptom-reporting PROM that has been demonstrated to be reliable (test-retest reliability was 0.7 or greater for 36 of 49 prespecified items) and responsive (item changes corresponded to the QLQ-C30 scale) [27]. There are a number of studies that have demonstrated that the PRO-CTCAE is acceptable to patients from differing cancer populations internationally [28,29]

1  
2  
3 206 'very much'). The core set of questions includes anorexia, constipation, dyspnoea,  
4  
5 207 diarrhoea, fatigue, nausea, pain, sensory neuropathy, vomiting, cough, low mood  
6  
7  
8 208 and anxiety. Basch's (2016) study used a weekly completion schedule on an app  
9  
10 209 with alerts sent to clinicians in real-time [5]. However, use of apps for patient  
11  
12 210 reporting was not compatible with the health service's patient confidentiality policy.  
13  
14 211 The intervention was adapted to include PROM reporting only during scheduled  
15  
16 212 attendances for outpatient clinic appointments. Thus, reporting to clinicians will occur  
17  
18 213 in line with existing clinic visits, which may be weekly or less frequently depending on  
19  
20 214 cancer diagnosis, stage and treatment regimen. PROMs reports will be made  
21  
22 215 available for health professionals to view and respond to. This could include referring  
23  
24 216 the patient to allied health or supportive care, counselling, or additional  
25  
26 217 pharmacological support (e.g. adjusting pain medications). PROMS will be added in  
27  
28 218 paper format to the patient chart, and in keeping with local practice, will be scanned  
29  
30 219 into the electronic medical record at a later date.

31  
32  
33  
34  
35  
36 220 In summary, the iPROMOS intervention consists of, a) patients self-reporting  
37  
38 221 symptoms (PRO-CTCAE PROM) using a touchscreen computer with data captured  
39  
40 222 on a custom-built REDCap database; b) reports of this information are generated in  
41  
42 223 real time; c) these reports are available to all healthcare team members and filed in  
43  
44 224 the patients' medical record; and, d) a copy of the report is also provided to the  
45  
46 225 patient. Usual care is clinician assessment of symptoms without the additional use of  
47  
48 226 a PROM.

49  
50  
51  
52  
53 227 In the co-design process, using the broader research evidence, investigated to  
54  
55 228 support clinician's recommendations, a reported symptom of grade 2 or higher for  
56  
57 229 nausea, vomiting or anorexia, and grade 3 for all other symptoms is considered  
58  
59  
60

1  
2  
3 230 significant [5]. If there is an increase in symptoms greater than 2 points from the  
4  
5 231 previous visit, this will also trigger a referral by established pathways to the relevant  
6  
7 232 allied health professional.  
8  
9

10  
11 233 *Setting of the implementation:*  
12

13  
14 234 This project will be conducted in a tertiary teaching/quaternary referral hospital-  
15  
16 235 located in South-East Queensland, Australia. The health service for this centre is  
17  
18 236 the largest in Australia, with the oncology outpatients' department running up to 14  
19  
20 237 clinics in one day. Each of these clinics are oncologist specific, providing service for  
21  
22 238 treatment, surveillance and follow-up for the patients in their care.  
23  
24  
25

26  
27 239 Contextual pre-implementation information has revealed key factors for successful  
28  
29 240 integration of the intervention (Table 2). Most importantly, the intervention needs to  
30  
31 241 engage all members of the multi-disciplinary team and the staff who will have access  
32  
33 242 to the PROM information to address symptoms, disease management and  
34  
35 243 treatment. To make this likely, the facilitator will aim to integrate the PROM collection  
36  
37 244 and reporting as much as possible into the existing workflow processes already in  
38  
39 245 place at the clinic. Evidence shows that workflows differ greatly between hospitals  
40  
41 246 and even within clinics in a hospital, and that staff are reluctant to change anything  
42  
43 247 that interrupts established practice, given the very complex environment they are  
44  
45 248 managing [26]. They are only willing to take on a new intervention when the benefits  
46  
47 249 and processes for patient care are tangible and clear. For successful  
48  
49 250 implementation, it has been identified that it is necessary to integrate with existing  
50  
51 251 patient care pathways and technological infrastructure, rather than impose another  
52  
53 252 layer, which would likely be met with resistance [26].  
54  
55  
56  
57  
58  
59  
60

1  
2  
3 253 *Participants:*  
4  
5

6  
7 254 This study will collect data from two main groups of participants: a) patients; and b)  
8  
9 255 the clinicians caring for them.  
10

11  
12 256 a) *Patients* who attend the randomised medical oncology outpatients' clinics for  
13  
14 257 treatment, medical review, active surveillance, or routine follow-up, with  
15  
16 258 sufficient English to read the questionnaires. Patients with significant  
17  
18 259 cognitive impairment, visual difficulties, or from a non-English speaking  
19  
20 260 background who might have difficulty completing the forms will be excluded  
21  
22 261 from the study.  
23  
24  
25

26  
27 262 *Patient Screening and Recruitment:* Patients attending selected clinics will be  
28  
29 263 invited to the use touchscreen computer to complete PROM information. The  
30  
31 264 first page of the PROM collection form provides a Patient Information Sheet  
32  
33 265 and Consent form. Potential participants will need to read the information and  
34  
35 266 accept to enter PROM reporting platform. If they do not wish to, they can  
36  
37 267 choose to decline. Patient information will also be visible on a poster  
38  
39 268 displayed in the clinical waiting area.  
40  
41  
42

43  
44 269 b) *Staff* who care for these patients' including nursing and medical staff,  
45  
46 270 pharmacists, dietitians, welfare workers, social workers, psychologists,  
47  
48 271 speech therapists, physiotherapists and other allied health workers are  
49  
50 272 eligible.  
51  
52  
53

54  
55 273 *Staff participation:* an opt-out approach to consent staff has been approved by  
56  
57 274 the ethics committee. Multidisciplinary staff will be contacted using various  
58  
59 275 communication channels, directly by the facilitator-researcher to collect pre-  
60

276 implementation information, as well as through distribution of information

277 brochures and poster developed in collaboration with the clinical teams.

278 *Methods of evaluation:*

279 *Process Measures used for implementation evaluation:*

280 Table 3: Process Measures of Implementation Evaluation

281

| Process measuring tool                                                                                                                                                                                                                                                                                                                                                          | Method of collection                                                            | Approach to analysis                                                                            |
|---------------------------------------------------------------------------------------------------------------------------------------------------------------------------------------------------------------------------------------------------------------------------------------------------------------------------------------------------------------------------------|---------------------------------------------------------------------------------|-------------------------------------------------------------------------------------------------|
| <b>Context:</b> <ol style="list-style-type: none"> <li>1. Description of factors impacting and impacted</li> <li>2. Description of barriers and enablers</li> </ol>                                                                                                                                                                                                             | Facilitator field notes and site journal                                        | Qualitative: content analysis for a structured analysis                                         |
| <b>Feasibility:</b> <ol style="list-style-type: none"> <li>1. Number of patients that approached the touchscreen computer without prompting</li> <li>2. Time taken to complete PROM by patients</li> <li>3. Time required to assist patients complete PROM</li> <li>4. Number of return completions by patients</li> <li>5. Time taken to respond to report by staff</li> </ol> | Counts<br>Data from data-capture program<br>Self-report by staff<br>Field notes | Quantitative: descriptive statistics<br>Qualitative: content analysis for a structured analysis |
| <b>Fidelity:</b> <ol style="list-style-type: none"> <li>1. Number of missing encounters by patients</li> <li>2. Number of missing case report forms</li> <li>3. Reasons for missing data</li> </ol>                                                                                                                                                                             | Counts<br>Case report form data<br>Field notes                                  | Quantitative: descriptive statistics<br>Qualitative: content analysis for a structured analysis |

|                                                                                                                                                                                                                                                                                                                                                                                            |                                                               |                                                                                                            |
|--------------------------------------------------------------------------------------------------------------------------------------------------------------------------------------------------------------------------------------------------------------------------------------------------------------------------------------------------------------------------------------------|---------------------------------------------------------------|------------------------------------------------------------------------------------------------------------|
| <p><b>Reach:</b></p> <ol style="list-style-type: none"> <li><b>1. Number of staff that answered “yes” to whether they knew about the implementation</b></li> <li><b>2. Number of staff that stated that required education about PROMs</b></li> <li><b>3. Number of staff that independently used PROMs report</b></li> <li><b>4. Staff groups that responded to PROMs data</b></li> </ol> | <p>Counts</p> <p>Case report form data</p> <p>Field notes</p> | <p>Quantitative: descriptive statistics</p> <p>Qualitative: content analysis for a structured analysis</p> |
|--------------------------------------------------------------------------------------------------------------------------------------------------------------------------------------------------------------------------------------------------------------------------------------------------------------------------------------------------------------------------------------------|---------------------------------------------------------------|------------------------------------------------------------------------------------------------------------|

282

283 In accordance with the MRC Guidelines for Complex Interventions the iterative  
 284 implementation will be evaluated using both quantitative and qualitative process  
 285 measures as described in Table 3.

286 Following the iPARIHS framework, data will be collected by the facilitator who works  
 287 closely within the context. In this protocol, the facilitator will collect and use process  
 288 measures, with protocol-specified data collected at pre-specified time-points (Table  
 289 4).

290 Plan Do Study Act Cycles (PDSA) will be performed every 21 days as an interim  
 291 data analysis to evaluate progress, and to report these findings to clinicians so that  
 292 collaborative strategies can be established that maximise implementation. The  
 293 purpose of each PDSA cycle is to summarise and reflect on the implementation  
 294 process and improve it for the next cycle [16].

295

296 *Outcomes of the implementation:*



297 Table 4: Outcomes of the implementation

| Outcome Measure                                               | Method of Data Collection                                                                                                                                                | Approach to analysis                                                                                                |
|---------------------------------------------------------------|--------------------------------------------------------------------------------------------------------------------------------------------------------------------------|---------------------------------------------------------------------------------------------------------------------|
| <b>% patients completing PROM form</b>                        | Nominator of PROMs in electronic data capture; denominator of booking schedule of patients that attended clinic; facilitator field notes of reasons for any missing data | Quantitative: Descriptive Statistical Analysis; longitudinal analyses of % change.<br>Qualitative: Content analysis |
| <b>% staff acknowledging PROM data</b>                        | Case report forms; facilitator field notes                                                                                                                               | Quantitative: Descriptive Statistical Analysis; longitudinal analyses of % change.<br>Qualitative: Content analysis |
| <b>% PROMs in medical record</b>                              | Communication in the medical record; completed PROMs in electronic data capture; referral data                                                                           | Quantitative: Descriptive Statistical Analysis<br>Qualitative: Content analysis                                     |
| <b>Acceptability of PROM reporting for staff and patients</b> | Staff survey<br>Focus groups, interviews and field notes                                                                                                                 | Quantitative: Descriptive Statistical Analysis<br>Qualitative: Content Analysis to identify themes and interpret    |

298

299 The primary outcome of interest is successful implementation, and has been  
 300 operationalised as “PROM reports are made available to clinicians in 85% of  
 301 encounters, 70% of clinicians will respond to PROM data, and of those 50% of  
 302 responses will be noted in the patients’ medical record”. This was selected as other  
 303 studies reported that clinicians and patients are satisfied at such level of service  
 304 when use is identified as feasible and acceptable [27, 28].

305 Secondary outcomes will measure patient and staff acceptance. Staff surveys will be  
 306 distributed at the end of the PROMs data collection to capture change from baseline  
 307 in staff knowledge, and identified facilitators and barriers.

308 *Outcomes of the intervention:*

309 Table 5: Outcome Measures of the Intervention

| Outcome Measure                                                                         | Methods of collection                                                   | Approach to analysis                                                                                                                     |
|-----------------------------------------------------------------------------------------|-------------------------------------------------------------------------|------------------------------------------------------------------------------------------------------------------------------------------|
| Symptoms assessment by clinicians                                                       | Medical record entries, case report forms                               | Comparison of proportion of patients with symptom assessment between intervention and control group using chi-square test                |
| Response to symptom information                                                         | Medical record entries, case report forms                               | Proportion of patients referred for supportive care interventions compared between intervention and control groups using chi-square test |
| Change in symptom reporting and responding from pre-intervention to during intervention | Medical record entries, case report forms, PROM electronic data capture | Proportion of patients before to during intervention period using chi-square analysis and process control analysis                       |
| Presentations to the emergency department                                               | Medical record entries                                                  | Proportion of patients before to during intervention period using chi-square analysis and process control analysis                       |
| Hospital admissions                                                                     | Medical record entries                                                  | Proportion of patients before to during intervention period using chi-square analysis and process control analysis                       |

310

311 The primary outcome measure of the intervention will be counts of health  
 312 professional notes in the patients' chart about a symptom being of concern (for  
 313 example pain). As well as this, the response to such symptoms will be recorded (e.g.  
 314 referral to pain specialist).

1  
2  
3 315 Secondary outcomes will be an improvement in patient quality of life, presenting as a  
4  
5 316 clinically significant reduction in measured symptoms. More detailed explanation of  
6  
7 317 outcome measures is provided in Table 5.  
8  
9

10  
11 318 *Sample size:*  
12

13  
14 319 Berry et al (2014) conducted an RCT which compared symptom reports between  
15  
16 320 clinics using an electronic reporting tool. They assessed both processes and  
17  
18 321 outcomes of care, comparing the impact of PROM reports between the control and  
19  
20 322 intervention clinics. It was used to guide the sample size calculations because this  
21  
22 323 study measured the identification of symptoms in usual care versus a symptom-  
23  
24 324 PROMs intervention. To obtain an estimate of a minimal number of observations that  
25  
26 325 should be included in each cluster in this study, Berry et al's (2014) results were  
27  
28 326 used [29]. These researchers identified that a PROMs intervention increased  
29  
30 327 symptom detection by 10%. Using these findings, and 80% power, given a baseline  
31  
32 328 detection level of 0.75, 500 participant encounters would be needed to show  
33  
34 329 improvement by 10% or more.  
35  
36  
37  
38  
39

40 330 *Methods of Analysis:*  
41

42  
43  
44 331 *Quantitative analyses:* Quantitative measures have been designed for the process  
45  
46 332 measures of implementation evaluation, the outcome measures of the  
47  
48 333 implementation and the outcome measures of the intervention. Descriptive statistics  
49  
50 334 including counts, frequencies and proportions will be used to summarize data  
51  
52 335 collected. Other statistical analyses to be used will include chi-square analysis for  
53  
54 336 comparing proportions, linear mixed models for longitudinal analyses, and statistical  
55  
56 337 control process analysis to identify trends over time.  
57  
58  
59  
60

1  
2  
3 338 Data from both clusters will be analysed using inverse variance weighting so that the  
4  
5 339 difference can be estimated for all patient encounters. This analysis can be used to  
6  
7 340 adjust for cancer types, or clustering by clinicians [30]. This analysis will provide a  
8  
9 341 measure of the intra-cluster effect, which can then be used for power calculations in  
10  
11 342 future larger studies [[31].  
12  
13  
14  
15

16 343 *Qualitative data:*  
17  
18

19 344 The facilitator site journal will be used to record observations, and will be content  
20  
21 345 analysed to identify key themes, as a part of each PDSA cycle every 21 days.  
22  
23  
24

25 346 The analysis of the facilitator site field notes will be used to triangulate other  
26  
27 347 research findings highlighting aspects in need of further investigation. The function  
28  
29 348 of field notes is to identify processes in a given situation and describe how  
30  
31 349 participants contribute to, and impact, these [32]. Extracted data will be interpreted in  
32  
33 350 keeping with Miles and Huberman's approach (2014) using field notes who propose  
34  
35 351 an analysis of systematic coding, word by word, presenting the data visually to  
36  
37 352 identify patterns [33] .  
38  
39  
40  
41

42 353 *Data monitoring*  
43  
44

45 354 Data monitoring will ascertain high data quality, ensure rigour and mitigate biases.  
46  
47  
48

49 355 Data monitoring will be done through three processes:  
50  
51

- 52  
53 356 1. Quantitative data will be double entered for a random sample of 10% records,  
54  
55 357 and all records will be double entered should the error rate be greater than  
56  
57 358 5%.  
58  
59  
60

1  
2  
3 359 2. Monthly meetings with expert facilitators who are not involved with the project  
4  
5 360 to reflect on the implementation and evaluation of the project.

6  
7  
8 361 3. Supervision and oversight by the study team not directly involved in the  
9  
10 362 process of implementation.

11  
12  
13 363 *Ethical Considerations:*

14  
15  
16 364 This project has received ethical approval from the Royal Brisbane and Women's  
17  
18 365 Hospital Human Research Ethics Committee number HREC/16/QRBW/100.

19  
20  
21  
22 366 *Safety considerations*

23  
24  
25 367 The main purpose of the secondary outcome measures of the intervention is to  
26  
27 368 measure the safety of using this implementation approach. A potential safety issue  
28  
29 369 is that when patients complete the PROMs they expect that staff will act on that  
30  
31 370 information. If the implementation is not successful, staff may not do this in a timely  
32  
33 371 fashion or at all, and patients who report symptoms may not receive suitable  
34  
35 372 treatment. Any such issues where a PROMs report was not acted on will be noted  
36  
37 373 and described using the data collection tools for the project. The facilitator will raise  
38  
39 374 any issues where patient safety is at risk.

40  
41  
42  
43  
44  
45 375 *Data deposition and curation:*

46  
47  
48 376 All de-identified data will be stored on a REDCap database, on a secure university  
49  
50 377 server. Patient information will be stored on their medical record, and hospital-based  
51  
52 378 servers that are password protected. Data will be stored for 5 years. A formal data  
53  
54 379 management plan has been developed and approved by the Queensland University  
55  
56 380 of Technology Research Unit.

1  
2  
3 381 *Dissemination of results*  
4  
5

6 382 Results will be disseminated in peer-reviewed publications, and presented at  
7  
8  
9 383 national and international scientific meetings.  
10  
11

12 384  
13  
14

15  
16 385 *Discussion:*  
17  
18

19 386 This study proposes that successful implementation of PROMs requires  
20  
21 387 sophisticated attention to the local clinical setting and existing clinical workflows, and  
22  
23 388 can overcome barriers previously experienced in other settings by following a pre-  
24  
25 389 specified implementation approach with an experienced facilitator. It is important to  
26  
27 390 investigate implementation strategies as clinical trials have demonstrated significant  
28  
29 391 benefits for patients, but also reported the difficulties of using PROMs in complex  
30  
31 392 health systems outside the highly structured context of a clinical trial. Systematic  
32  
33 393 reviews recommend a structured implementation approach that considers the many  
34  
35 394 elements present in the health system into which PROMs are introduced. The use of  
36  
37 395 the iPARIHS framework with the MRC Guidelines for Implementation of Complex  
38  
39 396 Interventions, built upon the work of ISOQOL, offers an implementation strategy that  
40  
41 397 addresses the issues identified in the research to date. This study offers an  
42  
43 398 opportunity to scientifically measure implementation, potentially rapidly implement  
44  
45 399 PROMs into clinical practice and to inform future research and clinical practice.  
46  
47  
48  
49  
50

51  
52 400 Trial Status: Opened on 25 March 2018 and will continue until 12 months after the  
53  
54 401 last PROMs reporting encounter.  
55  
56  
57

58 402 References:  
59  
60

- 1  
2  
3 403 1. Coons, S.J., et al., *Recommendations on evidence needed to support*  
4  
5 404 *measurement equivalence between electronic and paper-based patient-*  
6  
7 405 *reported outcome (PRO) measures: ISPOR ePRO Good Research Practices*  
8  
9 406 *Task Force report*. Value Health, 2009. 12(4): p. 419-29.
- 11  
12 407 2. Revicki, D.A., et al., *Recommendations on health-related quality of life*  
13  
14 408 *research to support labeling and promotional claims in the United States*. Qual  
15  
16 409 Life Res, 2000. 9(8): p. 887-900.
- 18  
19 410 3. Antunes, B., Harding, R., Higginson, IJ. *Implementing patient-reported*  
20  
21 411 *outcome measures in palliative care clinical practice: a systematic review of*  
22  
23 412 *facilitators and barriers*. Palliat Med, 2014. 28(2): p. 158-75.
- 25  
26 413 4. Sharma, P., et al., *Evaluation of point-of-care PRO assessment in clinic*  
27  
28 414 *settings: integration, parallel-forms reliability, and patient acceptability of*  
29  
30 415 *electronic QOL measures during clinic visits*. Qual Life Res, 2016. 25(3): p.  
31  
32 416 575-83.
- 34  
35 417 5. Basch, E., et al., *Symptom Monitoring With Patient-Reported Outcomes*  
36  
37 418 *During Routine Cancer Treatment: A Randomized Controlled Trial*. J Clin  
38  
39 419 Oncol, 2016. 34(6): p. 557-65.
- 41  
42 420 6. Velikova, G., et al., *Patients report improvements in continuity of care when*  
43  
44 421 *quality of life assessments are used routinely in oncology practice: secondary*  
45  
46 422 *outcomes of a randomised controlled trial*. Eur J Cancer, 2010. 46(13): p.  
47  
48 423 2381-8.
- 50  
51 424 7. Klinkhammer-Schalke, M., et al., *Direct improvement of quality of life using a*  
52  
53 425 *tailored quality of life diagnosis and therapy pathway: randomised trial in 200*  
54  
55 426 *women with breast cancer*. Br J Cancer, 2012. 106(5): p. 826-38.
- 57  
58  
59  
60

- 1  
2  
3 427 8. Basch, E., et al., *Overall survival results of a trial assessing patient-reported*  
4  
5 428 *outcomes for symptom monitoring during routine cancer treatment.* JAMA,  
6  
7 429 2017. 318(2): p. 197-198.  
8  
9  
10 430 9. Denis, F., et al., *Randomized Trial Comparing a Web-Mediated Follow-up*  
11  
12 431 *With Routine Surveillance in Lung Cancer Patients.* J Natl Cancer Inst, 2017.  
13  
14 432 109(9).  
15  
16  
17 433 10. Basch, E., et al., *Overall Survival Results of a Trial Assessing Patient-*  
18  
19 434 *Reported Outcomes for Symptom Monitoring During Routine Cancer*  
20  
21 435 *Treatment.* Jama, 2017. 318(2): p. 197-198.  
22  
23  
24 436 11. Porter, I., et al., *Framework and guidance for implementing patient-reported*  
25  
26 437 *outcomes in clinical practice: evidence, challenges and opportunities.* J Comp  
27  
28 438 Eff Res, 2016. 5(5): p. 507-19.  
29  
30  
31 439 12. Duncan, E.A., Murray, J. *The barriers and facilitators to routine outcome*  
32  
33 440 *measurement by allied health professionals in practice: a systematic review.*  
34  
35 441 BMC Health Serv Res, 2012. 12: p. 96.  
36  
37  
38 442 13. Snyder, C.F., et al., *Implementing patient-reported outcomes assessment in*  
39  
40 443 *clinical practice: a review of the options and considerations.* Qual Life Res,  
41  
42 444 2012. 21(8): p. 1305-14.  
43  
44  
45 445 14. Craig, P., Petticrew, M. *Developing and evaluating complex interventions:*  
46  
47 446 *reflections on the 2008 MRC guidance.* Int J Nurs Stud, 2013. 50(5): p. 585-7.  
48  
49 447 15. Nilsen, P., *Making sense of implementation theories, models and frameworks.*  
50  
51 448 Implement Sci, 2015. 10: p. 53.  
52  
53  
54 449 16. Harvey, G. Kitson, A. *PARIHS revisited: from heuristic to integrated*  
55  
56 450 *framework for the successful implementation of knowledge into practice.*  
57  
58 451 Implement Sci, 2016. 11: p. 33.  
59  
60



- 1  
2  
3 452 17. Baskerville, N.B., Liddy, C., Hogg, W. *Systematic review and meta-analysis of*  
4  
5 453 *practice facilitation within primary care settings*. *Ann Fam Med*, 2012. 10(1): p.  
6  
7 454 63-74.
- 8  
9  
10 455 18. Moore, G.F., et al., *Process evaluation of complex interventions: Medical*  
11  
12 456 *Research Council guidance*. *Bmj*, 2015. 350: p. h1258.
- 13  
14 457 19. Hemming, K., Girling, A. *A menu-driven facility for power and detectable-*  
15  
16 458 *difference calculations in stepped-wedge cluster-randomized trials*. *Stata*  
17  
18 459 *Journal*, 2014. 14(2): p. 363-380.
- 19  
20 460 20. Fuller, C., et al., *The Feedback Intervention Trial (FIT)--improving hand-*  
21  
22 461 *hygiene compliance in UK healthcare workers: a stepped wedge cluster*  
23  
24 462 *randomised controlled trial*. *PLoS One*, 2012. 7(10): p. e41617.
- 25  
26 463 21. Campbell, M., et al., *Framework for design and evaluation of complex*  
27  
28 464 *interventions to improve health*. *Bmj*, 2000. 321(7262): p. 694-6.
- 29  
30 465 22. Hughes, J.P., Granston, T.S, Heagerty, P.J. *Current issues in the design and*  
31  
32 466 *analysis of stepped wedge trials*. *Contemp Clin Trials*, 2015. 45(Pt A): p. 55-  
33  
34 467 60.
- 35  
36 468 23. Liao, X., Zhou, X., Spiegelman, D. *A note on "Design and analysis of stepped*  
37  
38 469 *wedge cluster randomized trials"*. *Contemp Clin Trials*, 2015. 45(Pt B): p. 338-  
39  
40 470 339.
- 41  
42 471 24. Pinnock, H., et al., *Standards for Reporting Implementation Studies (StaRI)*  
43  
44 472 *Statement*. *BMJ*, 2017. 356: p. i6795.
- 45  
46 473 25. National Institute of Health. *Common Terminology Criteria for Adverse Events*  
47  
48 474 *v4.0 (CTCAE)*. *US Department of health and human services, May 28 2009*.  
49  
50 475 2009.
- 51  
52  
53  
54  
55  
56  
57  
58  
59  
60

- 1  
2  
3 476 26. Braithwaite, J., *Changing how we think about healthcare improvement*. Bmj,  
4  
5 477 2018. 361: p. k2014.  
6  
7  
8 478 27. Bainbridge, D., et al., *Multidisciplinary health care professionals' perceptions*  
9  
10 479 *of the use and utility of a symptom assessment system for oncology patients*.  
11  
12 480 J Oncol Pract, 2011. 7(1): p. 19-23.  
13  
14 481 28. Detmar, S.B., et al., *Health-related quality-of-life assessments and patient-*  
15  
16 482 *physician communication: a randomized controlled trial*. JAMA, 2002. 288(23):  
17  
18 483 p. 3027-34.  
19  
20 484 29. Berry, D.L., et al., *The electronic self report assessment and intervention for*  
21  
22 485 *cancer: promoting patient verbal reporting of symptom and quality of life*  
23  
24 486 *issues in a randomized controlled trial*. BMC Cancer, 2014. 14: p. 513.  
25  
26 487 30. Hooper, R., et al., *Sample size calculation for stepped wedge and other*  
27  
28 488 *longitudinal cluster randomised trials*. Stat Med, 2016. 35(26): p. 4718-4728.  
29  
30 489 31. Grayling, M.J., Wason, J.M., Mander, A.P. *Stepped wedge cluster*  
31  
32 490 *randomized controlled trial designs: a review of reporting quality and design*  
33  
34 491 *features*. Trials, 2017. 18(1): p. 33.  
35  
36 492 32. Silverman, D. *Interpreting Qualitative Data*. . 2006. Sage: London.  
37  
38 493 33. Miles, M., Huberman, A, Saldana, J. *Qualitative Data Analysis: A Methods*  
39  
40 494 *Sourcebook*. 2014, California: Sage.

41  
42  
43  
44  
45  
46  
47  
48 495  
49  
50  
51 496 Author Affiliations

52  
53  
54  
55 497 This protocol was developed as a component of a PhD project. The student and  
56  
57 498 supervisory team participated in the implementation science based approach of  
58  
59 499 protocol development.  
60

1  
2  
3 500 Natasha Roberts, Queensland University of Technology, Kelvin Grove, QLD,  
4  
5 501 Australia, and Royal Brisbane and Women's Hospital, Herston, QLD, Australia  
6  
7  
8 502 Monika Janda, Centre for Health Services Research, The University of Queensland,  
9  
10 503 Woolloongabba, QLD, Australia  
11  
12  
13 504 Alison Mudge, Department of Internal Medicine, Royal Brisbane and Women's  
14  
15 505 Hospital, Herston, QLD, Australia  
16  
17  
18  
19 506 Kimberly Alexander, School of Nursing, Queensland University of Technology, Kelvin  
20  
21 507 Grove, QLD, Australia  
22  
23  
24  
25 508 David Wyld, Cancer Care Services, Royal Brisbane and Women's Hospital, Herston,  
26  
27 509 QLD, Australia  
28  
29  
30  
31 510 Contributorship statement:  
32  
33  
34 511 NR and MJ drafted the protocol for this publication. AM contributed significantly to  
35  
36 512 the drafting of this publication, particularly with expertise in implementation science  
37  
38 513 and multi-disciplinary care. KA contributed expertise regarding nursing care,  
39  
40 514 symptom management and PROMs. DW contributed expertise regarding specialist  
41  
42 515 medical care and health services management.  
43  
44  
45  
46  
47 516 Acknowledgements  
48  
49  
50 517 I would like to acknowledge supervision and knowledge of my PhD supervisors MJ,  
51  
52 518 KA and DW, and ongoing expertise and support from AM. Appreciation also goes to  
53  
54 519 the Metro North Research Unit, and the Queensland University of Technology.  
55  
56  
57  
58 520 Thanks must go to the staff of the multi-disciplinary team in Cancer Care Services at  
59  
60

1  
2  
3 521 the Royal Brisbane and Women’s Hospital (RBWH) who contributed their time,  
4  
5 522 knowledge and expertise to the development of this protocol, in, Jenni Leutenegger,  
6  
7  
8 523 Therese Hayes and Annette Cubitt. Thanks also to the Consumer Representatives  
9  
10 524 at RBWH for their time in protocol development and pre-implementation data  
11  
12 525 collection, in particular Gary Power and Anita McGrath who gave their time  
13  
14  
15 526 contributing to the development of patient education and patient information sheets.  
16  
17

18 527 Funding:

19  
20  
21 528 This work is supported by the Royal Brisbane and Women’s Hospital Postgraduate  
22  
23 529 Scholarship and a QUT APA Scholarship. Computer equipment and infrastructure is  
24  
25  
26 530 funded by the “Susan Sudak Day to End Cancers” Diamond Care Grant.  
27  
28

29  
30 531 Competing interests statement:

31  
32  
33 532 There are none to declare  
34  
35

36 533  
37  
38

39  
40 534  
41  
42

43 535  
44  
45  
46  
47  
48  
49  
50  
51  
52  
53  
54  
55  
56  
57  
58  
59  
60

# BMJ Open

## The iPROMOS Protocol: A Stepped-Wedge Study to Implement Routine Patient Reported Outcomes in a Medical Oncology Outpatient Setting

|                                 |                                                                                                                                                                                                                                                                                                                                                                                                                                                                                                                                                                                                                           |
|---------------------------------|---------------------------------------------------------------------------------------------------------------------------------------------------------------------------------------------------------------------------------------------------------------------------------------------------------------------------------------------------------------------------------------------------------------------------------------------------------------------------------------------------------------------------------------------------------------------------------------------------------------------------|
| Journal:                        | <i>BMJ Open</i>                                                                                                                                                                                                                                                                                                                                                                                                                                                                                                                                                                                                           |
| Manuscript ID                   | bmjopen-2018-027046.R2                                                                                                                                                                                                                                                                                                                                                                                                                                                                                                                                                                                                    |
| Article Type:                   | Protocol                                                                                                                                                                                                                                                                                                                                                                                                                                                                                                                                                                                                                  |
| Date Submitted by the Author:   | 18-Dec-2018                                                                                                                                                                                                                                                                                                                                                                                                                                                                                                                                                                                                               |
| Complete List of Authors:       | Roberts, Natasha; Queensland University of Technology Faculty of Health, ; Royal Brisbane and Women's Hospital, Mudge, Alison; Royal Brisbane and Women's Hospital, Department of Internal Medicine and Aged Care<br>Alexander, Kim; Queensland University of Technology Faculty of Health, School of Nursing<br>Wyld, David; Royal Brisbane and Women's Hospital, Cancer Care Services<br>Janda, Monika; University of Queensland, Centre of Health Services Research, Faculty of Medicine; Queensland University of Technology, School of Public Health and Social Work, Institute for Health and Biomedical Innovation |
| <b>Primary Subject Heading</b>: | Oncology                                                                                                                                                                                                                                                                                                                                                                                                                                                                                                                                                                                                                  |
| Secondary Subject Heading:      | Health services research, Oncology, Patient-centred medicine, Evidence based practice                                                                                                                                                                                                                                                                                                                                                                                                                                                                                                                                     |
| Keywords:                       | PROMs, implementation, complex intervention, PRO-CTCAE, iPARIHS                                                                                                                                                                                                                                                                                                                                                                                                                                                                                                                                                           |
|                                 |                                                                                                                                                                                                                                                                                                                                                                                                                                                                                                                                                                                                                           |

SCHOLARONE™  
Manuscripts

1  
2  
3  
4 1 **The iPROMOS Protocol: A Stepped-Wedge Study to**  
5  
6  
7 2 **Implement Routine Patient Reported Outcomes in a**  
8  
9  
10 3 **Medical Oncology Outpatient Setting**  
11  
12  
13  
14 4

15  
16 5 Natasha A Roberts<sup>1,2</sup>

17  
18 6 n6.roberts@hdr.qut.edu.au

19  
20  
21 7 Cancer Care Services

22  
23 8 Royal Brisbane and Women's Hospital,

24  
25 9 QLD, Australia

26  
27  
28  
29  
30 11 School of Public Health and Social Work,

31  
32 12 Queensland University of Technology,

33  
34 13 Musk Avenue, Kelvin Grove, QLD, 4059

35  
36  
37  
38  
39 15 Alison Mudge<sup>1,2</sup>

40  
41 16 Alison.mudge@health.qld.gov.au

42  
43 17 Department of Internal Medicine and Aged Care

44  
45  
46 18 Royal Brisbane and Women's Hospital

47  
48 19 QLD, Australia

49  
50  
51 20 School of Public Health and Social Work,  
52  
53  
54  
55  
56  
57  
58  
59  
60

---

1  
2  
3 21 Queensland University of Technology,  
4  
5 22 Musk Avenue, Kelvin Grove, QLD, 4059  
6  
7

8 23

9  
10 24 Kimberly Alexander<sup>1</sup>

11  
12 25 k.alexander@qut.edu.au

13  
14 26 School of Nursing

15  
16 27 Queensland University of Technology

17  
18 28 Musk Avenue, QLD, 4059  
19  
20  
21

22 29

23  
24 30 David Wyld<sup>1,3</sup>

25  
26 31 david.wyld@health.qld.gov.au

27  
28 32 Cancer Care Services

29  
30 33 Royal Brisbane and Women's Hospital

31  
32 34 QLD, Australia  
33  
34  
35

36 35

37  
38 36 School of Medicine,

39  
40 37 University of Queensland, QLD, Australia  
41  
42

43 38

44  
45 39 Monika Janda<sup>1,3</sup>

46  
47 40 m.janda@uq.edu.au

48  
49 41 Centre for Health Services Research,

50  
51 42 The University of Queensland, QLD, Australia  
52  
53  
54  
55  
56  
57  
58  
59  
60

1  
2  
3 43  
4  
5  
6 44 School of Public Health and Social Work,  
7  
8 45 Queensland University of Technology,  
9  
10 46 QLD, Australia  
11  
12 47 Correspondence:  
13  
14 48 Natasha A Roberts  
15  
16  
17 49 N6.roberts@hdr.qut.edu.au  
18  
19 50 1. Queensland University of Technology, QLD, Australia  
20  
21 51 2. Royal Brisbane and Women's Hospital, QLD, Australia  
22  
23  
24 52 3. The University of Queensland, QLD Australia  
25  
26  
27  
28  
29  
30  
31  
32  
33  
34  
35  
36  
37  
38  
39  
40  
41  
42  
43  
44  
45  
46  
47  
48  
49  
50  
51  
52  
53  
54  
55  
56  
57  
58  
59  
60

1. Queensland University of Technology, QLD, Australia
2. Royal Brisbane and Women's Hospital, QLD, Australia
3. The University of Queensland, QLD Australia



1  
2  
3 54 Abstract:  
4

5 55 Introduction: Patient Reported Outcomes (PROMs) are data capture tools that collect  
6  
7  
8 56 information directly from patients. Several large research studies provide evidence  
9  
10 57 that use of PROMs in routine care provides benefits to mortality and morbidity  
11  
12 58 outcomes in medical oncology patients. Despite this, implementation of PROMs in  
13  
14 59 daily clinical routine is slow and challenging.

15  
16  
17  
18 60 Methods and Analysis: This study will use a stepped-wedge design to assess the  
19  
20 61 implementation of a PROM intervention in highly frequented medical oncology  
21  
22 62 outpatient clinics. During a lead-in period of four weeks, control data will be  
23  
24 63 collected. The intervention will then be implemented for four weeks in Clinic 1  
25  
26 64 initially, then in Clinic 2 for another four weeks. 500 patient encounters will be  
27  
28 65 measured over the 12 weeks in total. The process of implementation will be informed  
29  
30 66 and evaluated using the Medical Research Council (MRC) Guidelines for  
31  
32 67 Implementing Complex Interventions. The study will be guided by the iPARIHS  
33  
34 68 framework approach to implementation. The intervention and implementation  
35  
36 69 outcomes will be measured using qualitative and quantitative data.

37  
38  
39  
40  
41  
42 70 Ethics and Dissemination: Ethical approval has been obtained, approval number  
43  
44 71 HREC/16/QRBW/100 by the Royal Brisbane and Women's Hospital Human  
45  
46 72 Research Ethics Committee. Results will be disseminated in peer reviewed journals  
47  
48 73 and at scientific meetings.

49  
50  
51  
52 74 Trial Registration Number: Australian New Zealand Clinical Trials Registry  
53  
54 75 (ANZCTR): ACTRN12618000398202.  
55  
56  
57

58 76  
59  
60

## 77 Article Summary:

## 78 Strengths and limitations of this study

## 79 Limitations:

- 80 • One non-blinded researcher will implement the intervention, collect and  
81 analyse the data.
- 82 • Response bias and social desirability bias (of both health professionals and  
83 patients that choose to participate)
- 84 • Bias by the Hawthorne Effect whereby clinics being observed during the pre-  
85 implementation phase may start to change practice.

## 86 Strengths

- 87 • A stepped-wedge design ensures an incremental implementation into clinical  
88 practice.
- 89 • Prospective use of an implementation framework will make sure that enablers  
90 and barriers in the setting are collected and reported allowing the findings  
91 from this study to inform future integration of PROMs into routine clinical care.

92

93

1  
2  
3 95 Introduction:  
4  
5

6 96 *What are Patient Reported Outcome Measures (PROMs)?*  
7  
8  
9

10 97 The Federal Drug Administration (FDA) defines PROMs as “any report of the status  
11  
12 98 of a patient’s health condition that comes directly from the patient, without  
13  
14 99 interpretation of the patient’s response by a clinician or anyone else” [1]. Revicki et al  
15  
16  
17 100 (2000) describe PROMs as validated self-reporting assessment tools that capture  
18  
19 101 the patient experience [2]. PROMs have been extensively evaluated for their  
20  
21 102 sensitivity, specificity, overall accuracy and predictive value. They are now regarded  
22  
23 103 to have excellent precision, similar to many other widely-used clinical assessment  
24  
25 104 tools including pathological tests or medical imaging reports [3]. PROMs can provide  
26  
27 105 an overview of a patient’s physical, emotional, functional or overall health status, or  
28  
29 106 can be used to assess specific treatment outcomes or symptoms [4].  
30  
31  
32  
33

34 107 *PROMs in clinical practice*  
35  
36  
37

38 108 PROMs are commonly used as outcome measures in research. However more  
39  
40 109 recently there is evidence that their real-time application in clinical practice can  
41  
42 110 enhance clinical interactions and improve patient experience. Several studies have  
43  
44 111 shown that using PROMs in routine care leads to improved quality of life (QOL) [3, 5]  
45  
46 112 as well as improved communication, decision-making, care planning and patient  
47  
48 113 satisfaction [6-8]. Two recent studies demonstrated improvements in patient mortality  
49  
50 114 and morbidity when technology-facilitated PROMs data collection was incorporated  
51  
52  
53 115 in oncology care [5, 9, 10].  
54  
55  
56  
57  
58  
59  
60

1  
2  
3 116 Given these evidence-based benefits, translating these findings into practice by  
4  
5 117 integrating PROMs into routine clinical care is the next required step in the  
6  
7 118 implementation cycle.  
8  
9

### 10 11 119 *The Complexities of Implementing PROMs into the Clinical Setting* 12

13  
14 120 A number of systematic reviews [3, 11, 12] reported that multiple organisational,  
15  
16 121 technical and clinical factors need to be overcome before introducing PROMs. In  
17  
18 122 particular, a lack of engagement from health care professionals, concerns about the  
19  
20 123 workflow of generating and filing of PROM reports, and lack of clearly defined  
21  
22 124 approaches in how to respond to the PROM data that indicate a patient need (e.g.  
23  
24 125 elevated pain or depression) have been identified as barriers to successful  
25  
26 126 implementation. The International Society of Quality of Life (ISOQOL) advocates a  
27  
28 127 stepwise approach to implementing PROMs, and provides a User's Guide [13],  
29  
30 128 which was updated in 2018. Klinkhammer-Schalke (2014) identified that a stepwise  
31  
32 129 approach was most useful when integrating a PROM intervention into routine care,  
33  
34 130 as it allows cycles of iterative learning during the implementation [7].  
35  
36  
37  
38  
39  
40

41 131 Incorporating PROMs into clinical practice should be considered a complex  
42  
43 132 intervention, with many elements impacting on the intervention, and vice versa [14]  
44  
45 133 Given these complexities, it has been recommended to use an implementation  
46  
47 134 framework to increase the likelihood of success when aiming to integrate PROMs  
48  
49 135 into routine care [15]. Use of a framework approach can help to consider both the  
50  
51 136 processes and intended outcomes of implementation. The Promoting Action  
52  
53 137 Research in Health Services (i-PARIHS) framework appears well suited, as it  
54  
55 138 highlights elements for consideration within the context (e.g. the features of the  
56  
57 139 particular clinic in which PROMs are to be integrated), the stakeholders (e.g.  
58  
59  
60

1  
2  
3 140 patients, clinicians, administrative staff) impacted by the intervention, and the  
4  
5 141 evidence surrounding the intervention (e.g. how much do stakeholders value the new  
6  
7 142 PROM information presented to them) [16]. A unique feature of iPARIHS is that it  
8  
9 143 stresses the central importance of a facilitator, who works with the local stakeholders  
10  
11 144 to adapt the evidence-based intervention for the local context. Antune's (2014)  
12  
13 145 systematic review provided evidence for the important role of a facilitator of the  
14  
15 146 implementation process [3], with enhanced successful uptake if one was present  
16  
17 147 [17,18]. For example, Baskerville et al (2012) showed that medical practices were  
18  
19 148 2.76 more likely to adopt evidence-based guidelines when a facilitator was working  
20  
21 149 in the local context [17].  
22  
23  
24  
25  
26

27 150 Besides the implementation framework, the Medical Research Council (MRC)  
28  
29 151 Guidelines for Implementation of Complex Interventions can provide guidance on  
30  
31 152 how to best incorporate pre-specified process measure. The Guidelines "can be  
32  
33 153 used to assess fidelity and quality of implementation, clarify causal mechanisms and  
34  
35 154 identify contextual factors associated with variation in outcomes" [18]. The MRC  
36  
37 155 approach ensures active evaluation throughout the implementation, and highlights  
38  
39 156 how to mitigate the impact that the introduction of new workflows has on the context,  
40  
41 157 participants and the intervention.  
42  
43  
44  
45  
46

47 158 In summary, the aim of this implementation study is to investigate implementation of  
48  
49 159 symptom reporting PROMs system into the outpatient oncology setting. The  
50  
51 160 objective of the intervention will be to increase detection of symptoms by clinicians  
52  
53 161 using the PROMs data. The implementation objectives include the successful  
54  
55 162 engagement of clinicians to use PROMs in clinical practice, the successful use of  
56  
57  
58  
59  
60

1  
2  
3 163 technology to obtain PROMs data from patients and present reports to clinicians,  
4  
5 164 and the identification of appropriate local strategies to respond to PROM information.  
6  
7  
8

9 165 Methods and Analysis:

10  
11  
12 166 *Study design*  
13  
14  
15

16 167 This mixed-methods study will use a stepped wedge cluster design. PROMs will be  
17  
18 168 introduced sequentially into two independent clinics, and all intervention and  
19  
20 169 implementation outcomes will be prospectively evaluated. The stepped wedge  
21  
22 170 approach has been chosen as it is a pragmatic solution for the systematic  
23  
24 171 introduction of a complex intervention [19], and has been successfully used in a  
25  
26 172 number of studies related to service delivery improvements [20, 21]. Another  
27  
28 173 advantage of this study design is that it limits bias by randomly assigning the clinics  
29  
30 174 to the intervention in sequential order. There are key elements that require attention  
31  
32 175 with this study design including the consideration of timing of study time-points,  
33  
34 176 cluster equivalence within the setting and intervention uptake assessed by process  
35  
36 177 measures [22, 23].  
37  
38  
39  
40  
41

42 178 The first clinic will be observed during a current standard practice lead-in period for  
43  
44 179 four weeks, then introduced into the iPROMOS intervention, while the other clinic will  
45  
46 180 continue with current standard practice and await implementation of iPROMOS. Data  
47  
48 181 collection and intervention time-points are presented Table 1.  
49  
50  
51

52  
53 182 Table 1: Cluster stepped-wedge study design for iPROMOS  
54

| Timepoint | T1 (weeks 0-4) | T2 (weeks 4-8) | T3 (weeks 8-12) |
|-----------|----------------|----------------|-----------------|
| Clinic 1  | Control Data   | Intervention   | Intervention    |
| Clinic 2  | Control Data   | Control Data   | Intervention    |

1  
2  
3 183 This protocol was co-designed with clinicians, academics and patient  
4  
5 184 representatives. The iPROMOS intervention was informed by pre-implementation  
6  
7 185 data collected from health professionals and relevant local stakeholders (Table 2).  
8  
9 186 Reporting will follow Standards for Reporting Implementation Studies (StaRI)[24].  
10  
11  
12  
13 187 Table 2: Summary of pre-implementation information and how it informed  
14  
15 188 implementation design  
16  
17

| Aim                                         | Data collected                                                                                                                                                                                                                                                                                                                                                                                                                            | Description of Findings                                                                                                                                                                                                                                                                                                                                                                                                                             | Implementation strategies                                                                                                                                                                                                                                                                                                                                                                                                                                                       |
|---------------------------------------------|-------------------------------------------------------------------------------------------------------------------------------------------------------------------------------------------------------------------------------------------------------------------------------------------------------------------------------------------------------------------------------------------------------------------------------------------|-----------------------------------------------------------------------------------------------------------------------------------------------------------------------------------------------------------------------------------------------------------------------------------------------------------------------------------------------------------------------------------------------------------------------------------------------------|---------------------------------------------------------------------------------------------------------------------------------------------------------------------------------------------------------------------------------------------------------------------------------------------------------------------------------------------------------------------------------------------------------------------------------------------------------------------------------|
| To engage health professionals and patients | Physical environment mapped<br><br>Field notes<br><br>Focus groups/interviews with multi-disciplinary team members and patient representatives of enablers and barriers<br><br>Staff survey of knowledge modelled on Rouette's (2015) assessing knowledge about PROMs including facilitators and barriers [25], PROMs data format, enablers and barriers. Questions are scored on a Likert scale with questions such as "My understanding | The physical environment is busy but movement of patients, staff and medical records is established<br><br>There are many established treatment pathways for patient care based on disease group, stage of disease and treatment regimen<br><br>Previous interventions have been unsuccessful due to a lack of collaboration with staff and patients<br><br>Knowledge about PROMs and current evidence is different across health discipline groups | Touch-screen computers will be positioned for easy access by patients as they enter the clinic area<br><br>PROMs reports will be made available to staff prior to patient encounter<br><br>PROMs data entry design, and equipment was sourced in collaboration with consumer representatives<br><br>Information resources were developed in collaboration with staff and patient representatives, including posters, information sheets, staff brochures and inservice material |

1  
2  
3  
4  
5  
6  
7  
8  
9  
10  
11  
12  
13  
14  
15  
16  
17  
18  
19  
20  
21  
22  
23  
24  
25  
26  
27  
28  
29  
30  
31  
32  
33  
34  
35  
36  
37  
38  
39  
40  
41  
42  
43  
44  
45  
46  
47  
48  
49  
50  
51  
52  
53  
54  
55  
56  
57  
58  
59  
60

|                                                                                                                                                                                                           |                                                                                                                                                                                                                                                                                                                                                                                                                                                                                                                                                                                                             |                                                                                                                                                                                                                                                                                                                                                                                                            |
|-----------------------------------------------------------------------------------------------------------------------------------------------------------------------------------------------------------|-------------------------------------------------------------------------------------------------------------------------------------------------------------------------------------------------------------------------------------------------------------------------------------------------------------------------------------------------------------------------------------------------------------------------------------------------------------------------------------------------------------------------------------------------------------------------------------------------------------|------------------------------------------------------------------------------------------------------------------------------------------------------------------------------------------------------------------------------------------------------------------------------------------------------------------------------------------------------------------------------------------------------------|
| <p>of PROs is...(very poor, poor, fair, good, very good)", "My lack of understanding of PROs is a barrier to using them in clinical practice (almost never, rarely, sometimes, often, almost always)"</p> |                                                                                                                                                                                                                                                                                                                                                                                                                                                                                                                                                                                                             |                                                                                                                                                                                                                                                                                                                                                                                                            |
| <p>To effectively incorporate technology</p> <p>Field notes</p> <p>Map of Information Technology Systems that interact with patient care, including the physical environment</p>                          | <p>Many electronic medical records systems interact with patients and staff but not with each other. If PROMs data becomes a report it can be stored as such in the patient's medical record</p> <p>Paper-based reports can be more easily integrated into patient records</p> <p>Development of a system specific for each individual health service is expensive and time consuming. It is unclear whether this would be integrated into current IT systems, or become another log on for staff, which reduces their likelihood of engagement. No ready-made system could be identified for purchase.</p> | <p>A simple electronic data capture system (REDCap) will be used to collect PROMs data and generate reports. A simple set-up provides the flexibility needed for integration and implementation whilst ensuring the fidelity of the intervention.</p> <p>Developing/funding a more sophisticated platform for collecting PROMs from patients can be informed by the successful implementation process.</p> |
| <p>To manage and respond to PROMs data</p> <p>Focus groups/interviews and field notes to map referral and</p>                                                                                             | <p>Reports can inform referrals, in the format of documentation in the medical record, verbal communication or by email.</p>                                                                                                                                                                                                                                                                                                                                                                                                                                                                                | <p>Alerts criteria will be generated directly to the appropriate specialist nurse and allied health</p>                                                                                                                                                                                                                                                                                                    |



1  
2  
3  
4  
5  
6  
7  
8  
9  
10  
11  
12  
13  
14  
15  
16  
17  
18  
19  
20  
21  
22  
23  
24  
25  
26  
27  
28  
29  
30  
31  
32  
33  
34  
35  
36  
37  
38  
39  
40  
41  
42  
43  
44  
45  
46  
47  
48  
49  
50  
51  
52  
53  
54  
55  
56  
57  
58  
59  
60

|                                                                                         |                                                                                                                                                                                                                                                                                                                                                                                                                                                                                  |                                                                                                                                          |
|-----------------------------------------------------------------------------------------|----------------------------------------------------------------------------------------------------------------------------------------------------------------------------------------------------------------------------------------------------------------------------------------------------------------------------------------------------------------------------------------------------------------------------------------------------------------------------------|------------------------------------------------------------------------------------------------------------------------------------------|
| <p>communication pathways</p> <p>iPARIHS Context assessments of clinical areas [15]</p> | <p>The best approach needs to be identified with the relevant clinical team/area.</p> <p>Symptom assessment by clinicians uses CTCAE v4.0 as standard practice. CTCAE is the Common Terminology Criteria for Adverse Events, developed by the US Department of Health and Human Services which offers universal assessment and grading of symptoms of disease and treatment</p> <p>Allied health and specialist nurse roles are in place for management of specific symptoms</p> | <p>team member to integrate into their practice.</p> <p>PROMs reports will be used to inform assessment and clinical decision making</p> |
|-----------------------------------------------------------------------------------------|----------------------------------------------------------------------------------------------------------------------------------------------------------------------------------------------------------------------------------------------------------------------------------------------------------------------------------------------------------------------------------------------------------------------------------------------------------------------------------|------------------------------------------------------------------------------------------------------------------------------------------|

189 *Patient and Public Involvement:*

190 The process of consumer engagement through protocol development informed the  
 191 research question and study protocol. Consumer representatives within the health  
 192 services, and on a research advisory group were approached to discuss the project.  
 193 They confirmed a need for patient self-reporting of symptoms that are integrated into  
 194 routine care. Their reports would need to be available to staff so that their concerns  
 195 could be actioned. During the development of the protocol, consumer  
 196 representatives were involved in the development of patient resources and collection  
 197 of pre-implementation data. They also assessed the anticipated burden of the  
 198 intervention on patients, and this will continue to be evaluated with consumer input  
 199 through the study. This will be done through PDSA cycle evaluation from qualitative  
 200 data collected and ongoing consumer representative input.

1  
2  
3 201 Results will be disseminated on information boards in the health service, and  
4  
5 202 reported back to Consumer Representative forums.  
6  
7

8  
9 203 *Key features of the intervention:*  
10

11  
12 204 Based on the published evidence [5] and data from local clinicians as summarised in  
13  
14 205 Table 2, the PRO-CTCAE was selected as the PROM to be implemented, as it was  
15  
16 206 developed to extend an assessment by clinicians using the CTCAE [26], and has  
17  
18 207 been demonstrated to provide significant benefits for patient care and outcomes [10].  
19  
20 208 PRO-CTCAE is a validated (119 of 124 items met at least 1 construct validity  
21  
22 209 criterion) symptom-reporting PROM that has been demonstrated to be reliable (test-  
23  
24 210 retest was 0.7 or greater for 39 of 49 pre-specified terms) and responsive (item  
25  
26 211 changes corresponded to the QLQ C-30 scale) [27]. There are a number of studies  
27  
28 212 that have demonstrated that the PRO-CTCAE is acceptable to patients from differing  
29  
30 213 cancer populations internationally [28,29]. This PROM allows patients to report how  
31  
32 214 much they experience each symptom, and the impact on their daily activities, on a  
33  
34 215 five-point Likert scale (ranging from 'none' to 'very much'). The core set of questions  
35  
36 216 includes anorexia, constipation, dyspnoea, diarrhoea, fatigue, nausea, pain, sensory  
37  
38 217 neuropathy, vomiting, cough, low mood and anxiety. Basch's (2016) study used a  
39  
40 218 weekly completion schedule on an app with alerts sent to clinicians in real-time [5].  
41  
42 219 However, use of apps for patient reporting was not compatible with the health  
43  
44 220 service's patient confidentiality policy. The intervention was adapted to include  
45  
46 221 PROM reporting only during scheduled attendances for outpatient clinic  
47  
48 222 appointments. Thus, reporting to clinicians will occur in line with existing clinic visits,  
49  
50 223 which may be weekly or less frequently depending on cancer diagnosis, stage and  
51  
52 224 treatment regimen. PROMs reports will be made available for health professionals to  
53  
54  
55  
56  
57  
58  
59  
60

1  
2  
3 225 view and respond to. This could include referring the patient to allied health or  
4  
5 226 supportive care, counselling, or additional pharmacological support (e.g. adjusting  
6  
7 227 pain medications). PROMS will be added in paper format to the patient chart, and in  
8  
9 228 keeping with local practice, will be scanned into the electronic medical record at a  
10  
11 229 later date.  
12  
13  
14  
15

16 230 In summary, the iPROMOS intervention consists of, a) patients self-reporting  
17  
18 231 symptoms (PRO-CTCAE PROM) using a touchscreen computer with data captured  
19  
20 232 on a custom-built REDCap database; b) reports of this information are generated in  
21  
22 233 real time; c) these reports are available to all healthcare team members and filed in  
23  
24 234 the patients' medical record; and, d) a copy of the report is also provided to the  
25  
26 235 patient. Usual care is clinician assessment of symptoms without the additional use of  
27  
28 236 a PROM.  
29  
30  
31  
32

33 237 In the co-design process, using the broader research evidence, investigated to  
34  
35 238 support clinician's recommendations, a reported symptom of grade 2 or higher for  
36  
37 239 nausea, vomiting or anorexia, and grade 3 for all other symptoms is considered  
38  
39 240 significant [5]. If there is an increase in symptoms greater than 2 points from the  
40  
41 241 previous visit, this will also trigger a referral by established pathways to the relevant  
42  
43 242 allied health professional.  
44  
45  
46  
47

48 243 *Setting of the implementation:*  
49  
50

51 244 This project will be conducted in a tertiary teaching/quaternary referral hospital-  
52  
53 245 located in South-East Queensland, Australia. The health service for this centre is  
54  
55 246 the largest in Australia, with the oncology outpatients' department running up to 14  
56  
57  
58  
59  
60

1  
2  
3 247 clinics in one day. Each of these clinics are oncologist specific, providing service for  
4  
5 248 treatment, surveillance and follow-up for the patients in their care.  
6  
7  
8

9 249 Contextual pre-implementation information has revealed key factors for successful  
10  
11 250 integration of the intervention (Table 2). Most importantly, the intervention needs to  
12  
13 251 engage all members of the multi-disciplinary team and the staff who will have access  
14  
15 252 to the PROM information to address symptoms, disease management and  
16  
17 253 treatment. To make this likely, the facilitator will aim to integrate the PROM collection  
18  
19 254 and reporting as much as possible into the existing workflow processes already in  
20  
21 255 place at the clinic. Evidence shows that workflows differ greatly between hospitals  
22  
23 256 and even within clinics in a hospital, and that staff are reluctant to change anything  
24  
25 257 that interrupts established practice, given the very complex environment they are  
26  
27 258 managing [30]. They are only willing to take on a new intervention when the benefits  
28  
29 259 and processes for patient care are tangible and clear. For successful  
30  
31 260 implementation, it has been identified that it is necessary to integrate with existing  
32  
33 261 patient care pathways and technological infrastructure, rather than impose another  
34  
35 262 layer, which would likely be met with resistance [30].  
36  
37  
38  
39  
40  
41

42 263 *Participants:*  
43  
44

45  
46 264 This study will collect data from two main groups of participants: a) patients; and b)  
47  
48 265 the clinicians caring for them.  
49  
50

51 266 a) *Patients* who attend the randomised medical oncology outpatients' clinics for  
52  
53 267 treatment, medical review, active surveillance, or routine follow-up, with  
54  
55 268 sufficient English to read the questionnaires. Patients with significant  
56  
57 269 cognitive impairment, visual difficulties, or from a non-English speaking  
58  
59  
60

1  
2  
3 270 background who might have difficulty completing the forms will be excluded  
4  
5 271 from the study.  
6  
7  
8

9 272 *Patient Screening and Recruitment:* Patients attending selected clinics will be  
10  
11 273 invited to the use touchscreen computer to complete PROM information. The  
12  
13 274 first page of the PROM collection form provides a Patient Information Sheet  
14  
15 275 and Consent form. Potential participants will need to read the information and  
16  
17 276 accept to enter PROM reporting platform. If they do not wish to, they can  
18  
19 277 choose to decline. Patient information will also be visible on a poster  
20  
21 278 displayed in the clinical waiting area.  
22  
23  
24  
25

26 279 b) *Staff* who care for these patients' including nursing and medical staff,  
27  
28 280 pharmacists, dietitians, welfare workers, social workers, psychologists,  
29  
30 281 speech therapists, physiotherapists and other allied health workers are  
31  
32 282 eligible.  
33  
34  
35

36 283 *Staff participation:* an opt-out approach to consent staff has been approved by  
37  
38 284 the ethics committee. Multidisciplinary staff will be contacted using various  
39  
40 285 communication channels, directly by the facilitator-researcher to collect pre-  
41  
42 286 implementation information, as well as through distribution of information  
43  
44 287 brochures and poster developed in collaboration with the clinical teams.  
45  
46  
47  
48

49 288 *Methods of evaluation:*  
50  
51

52 289 *Process Measures used for implementation evaluation:*  
53

54 290 Table 3: Process Measures of Implementation Evaluation  
55  
56 291

| Process measuring tool | Method of collection | Approach to analysis |
|------------------------|----------------------|----------------------|
|                        |                      |                      |

|                                                                                                                                                                                                                                                                                                                                                                                                                           |                                                                                           |                                                                                                         |
|---------------------------------------------------------------------------------------------------------------------------------------------------------------------------------------------------------------------------------------------------------------------------------------------------------------------------------------------------------------------------------------------------------------------------|-------------------------------------------------------------------------------------------|---------------------------------------------------------------------------------------------------------|
| <p><b>Context:</b></p> <ol style="list-style-type: none"> <li><b>1. Description of factors impacting and impacted</b></li> <li><b>2. Description of barriers and enablers</b></li> </ol>                                                                                                                                                                                                                                  | <p>Facilitator field notes and site journal</p>                                           | <p>Qualitative: content analysis for a structured analysis</p>                                          |
| <p><b>Feasibility:</b></p> <ol style="list-style-type: none"> <li><b>1. Number of patients that approached the touchscreen computer without prompting</b></li> <li><b>2. Time taken to complete PROM by patients</b></li> <li><b>3. Time required to assist patients complete PROM</b></li> <li><b>4. Number of return completions by patients</b></li> <li><b>5. Time taken to respond to report by staff</b></li> </ol> | <p>Counts<br/>Data from data-capture program<br/>Self-report by staff<br/>Field notes</p> | <p>Quantitative: descriptive statistics<br/>Qualitative: content analysis for a structured analysis</p> |
| <p><b>Fidelity:</b></p> <ol style="list-style-type: none"> <li><b>1. Number of missing encounters by patients</b></li> <li><b>2. Number of missing case report forms</b></li> <li><b>3. Reasons for missing data</b></li> </ol>                                                                                                                                                                                           | <p>Counts<br/>Case report form data<br/>Field notes</p>                                   | <p>Quantitative: descriptive statistics<br/>Qualitative: content analysis for a structured analysis</p> |
| <p><b>Reach:</b></p> <ol style="list-style-type: none"> <li><b>1. Number of staff that answered “yes” to whether they knew about the implementation</b></li> <li><b>2. Number of staff that stated that required education about PROMs</b></li> <li><b>3. Number of staff that independently used PROMs report</b></li> </ol>                                                                                             | <p>Counts<br/>Case report form data<br/>Field notes</p>                                   | <p>Quantitative: descriptive statistics<br/>Qualitative: content analysis for a structured analysis</p> |

1  
2  
3  
4  
5  
6  
7  
8  
9  
10  
11  
12

**4. Staff groups that responded to PROMs data**

13  
14

292

15  
16  
17  
18  
19  
20

293 In accordance with the MRC Guidelines for Complex Interventions the iterative  
294 implementation will be evaluated using both quantitative and qualitative process  
295 measures as described in Table 3.

21  
22  
23  
24  
25  
26  
27  
28  
29

296 Following the iPARIHS framework, data will be collected by the facilitator who works  
297 closely within the context. In this protocol, the facilitator will collect and use process  
298 measures, with protocol-specified data collected at pre-specified time-points (Table  
299 4).

30  
31  
32  
33  
34  
35  
36  
37  
38  
39  
40  
41  
42

300 Plan Do Study Act Cycles (PDSA) will be performed every 21 days as an interim  
301 data analysis to evaluate progress, and to report these findings to clinicians so that  
302 collaborative strategies can be established that maximise implementation. The  
303 purpose of each PDSA cycle is to summarise and reflect on the implementation  
304 process and improve it for the next cycle [16].

43  
44  
45

305

46  
47  
48

306 *Outcomes of the implementation:*

49  
50  
51

307 Table 4: Outcomes of the implementation

52

| Outcome Measure                        | Method of Data Collection                                                                       | Approach to analysis                                                                                                |
|----------------------------------------|-------------------------------------------------------------------------------------------------|---------------------------------------------------------------------------------------------------------------------|
| <b>% patients completing PROM form</b> | Nominator of PROMs in electronic data capture; denominator of booking schedule of patients that | Quantitative: Descriptive Statistical Analysis; longitudinal analyses of % change.<br>Qualitative: Content analysis |

53  
54  
55  
56  
57  
58  
59  
60

|                                                               |                                                                                                |                                                                                                                     |
|---------------------------------------------------------------|------------------------------------------------------------------------------------------------|---------------------------------------------------------------------------------------------------------------------|
|                                                               | attended clinic; facilitator field notes of reasons for any missing data                       |                                                                                                                     |
| <b>% staff acknowledging PROM data</b>                        | Case report forms; facilitator field notes                                                     | Quantitative: Descriptive Statistical Analysis; longitudinal analyses of % change.<br>Qualitative: Content analysis |
| <b>% PROMs in medical record</b>                              | Communication in the medical record; completed PROMs in electronic data capture; referral data | Quantitative: Descriptive Statistical Analysis<br>Qualitative: Content analysis                                     |
| <b>Acceptability of PROM reporting for staff and patients</b> | Staff survey<br>Focus groups, interviews and field notes                                       | Quantitative: Descriptive Statistical Analysis<br>Qualitative: Content Analysis to identify themes and interpret    |

308

309 The primary outcome of interest is successful implementation, and has been  
 310 operationalised as “PROM reports are made available to clinicians in 85% of  
 311 encounters, 70% of clinicians will respond to PROM data, and of those 50% of  
 312 responses will be noted in the patients’ medical record”. This was selected as other  
 313 studies reported that clinicians and patients are satisfied at such level of service  
 314 when use is identified as feasible and acceptable [31, 32].

315 Secondary outcomes will measure patient and staff acceptance. Staff surveys will be  
 316 distributed at the end of the PROMs data collection to capture change from baseline  
 317 in staff knowledge, and identified facilitators and barriers.

318 *Outcomes of the intervention:*

319 Table 5: Outcome Measures of the Intervention

| Outcome Measure | Methods of collection | Approach to analysis |
|-----------------|-----------------------|----------------------|
|-----------------|-----------------------|----------------------|



|                                                                                         |                                                                         |                                                                                                                                          |
|-----------------------------------------------------------------------------------------|-------------------------------------------------------------------------|------------------------------------------------------------------------------------------------------------------------------------------|
| Symptoms assessment by clinicians                                                       | Medical record entries, case report forms                               | Comparison of proportion of patients with symptom assessment between intervention and control group using chi-square test                |
| Response to symptom information                                                         | Medical record entries, case report forms                               | Proportion of patients referred for supportive care interventions compared between intervention and control groups using chi-square test |
| Change in symptom reporting and responding from pre-intervention to during intervention | Medical record entries, case report forms, PROM electronic data capture | Proportion of patients before to during intervention period using chi-square analysis and process control analysis                       |
| Presentations to the emergency department                                               | Medical record entries                                                  | Proportion of patients before to during intervention period using chi-square analysis and process control analysis                       |
| Hospital admissions                                                                     | Medical record entries                                                  | Proportion of patients before to during intervention period using chi-square analysis and process control analysis                       |

320

321 The primary outcome measure of the intervention will be counts of health  
 322 professional notes in the patients' chart about a symptom being of concern (for  
 323 example pain). As well as this, the response to such symptoms will be recorded (e.g.  
 324 referral to pain specialist).

325 Secondary outcomes will be an improvement in patient quality of life, presenting as a  
 326 clinically significant reduction in measured symptoms. More detailed explanation of  
 327 outcome measures is provided in Table 5.

328 *Sample size:*

1  
2  
3 329 Berry et al (2014) conducted an RCT which compared symptom reports between  
4  
5 330 clinics using an electronic reporting tool. They assessed both processes and  
6  
7 331 outcomes of care, comparing the impact of PROM reports between the control and  
8  
9 332 intervention clinics. It was used to guide the sample size calculations because this  
10  
11 333 study measured the identification of symptoms in usual care versus a symptom-  
12  
13 334 PROMs intervention. To obtain an estimate of a minimal number of observations that  
14  
15 335 should be included in each cluster in this study, Berry et al's (2014) results were  
16  
17 336 used [33]. These researchers identified that a PROMs intervention increased  
18  
19 337 symptom detection by 10%. Using these findings, and 80% power, given a baseline  
20  
21 338 detection level of 0.75, 500 participant encounters would be needed to show  
22  
23 339 improvement by 10% or more.  
24  
25  
26  
27  
28  
29

#### 30 340 Methods of Analysis:

31  
32  
33 341 *Quantitative analyses:* Quantitative measures have been designed for the process  
34  
35 342 measures of implementation evaluation, the outcome measures of the  
36  
37 343 implementation and the outcome measures of the intervention. Descriptive statistics  
38  
39 344 including counts, frequencies and proportions will be used to summarize data  
40  
41 345 collected. Other statistical analyses to be used will include chi-square analysis for  
42  
43 346 comparing proportions, linear mixed models for longitudinal analyses, and statistical  
44  
45 347 control process analysis to identify trends over time.  
46  
47  
48

49 348 Data from both clusters will be analysed using inverse variance weighting so that the  
50  
51 349 difference can be estimated for all patient encounters. This analysis can be used to  
52  
53 350 adjust for cancer types, or clustering by clinicians [34]. This analysis will provide a  
54  
55 351 measure of the intra-cluster effect, which can then be used for power calculations in  
56  
57 352 future larger studies [35].  
58  
59  
60

1  
2  
3 353 *Qualitative data:*  
4  
5

6  
7 354 The facilitator site journal will be used to record observations, and will be content  
8  
9 355 analysed to identify key themes, as a part of each PDSA cycle every 21 days.  
10  
11

12 356 The analysis of the facilitator site field notes will be used to triangulate other  
13  
14 357 research findings highlighting aspects in need of further investigation. The function  
15  
16 358 of field notes is to identify processes in a given situation and describe how  
17  
18 359 participants contribute to, and impact, these [36]. Extracted data will be interpreted in  
19  
20 360 keeping with Miles and Huberman's approach (2014) using field notes who propose  
21  
22 361 an analysis of systematic coding, word by word, presenting the data visually to  
23  
24 362 identify patterns [37] .  
25  
26  
27  
28

29 363 *Data monitoring*  
30  
31

32  
33 364 Data monitoring will ascertain high data quality, ensure rigour and mitigate biases.  
34  
35

36 365 Data monitoring will be done through three processes:  
37  
38

- 39  
40 366 1. Quantitative data will be double entered for a random sample of 10% records,  
41  
42 367 and all records will be double entered should the error rate be greater than  
43  
44 368 5%.  
45  
46  
47 369 2. Monthly meetings with expert facilitators who are not involved with the project  
48  
49 370 to reflect on the implementation and evaluation of the project.  
50  
51 371 3. Supervision and oversight by the study team not directly involved in the  
52  
53 372 process of implementation.  
54  
55  
56

57 373 *Ethical and dissemination:*  
58  
59  
60

1  
2  
3 374 This project has received ethical approval from the Royal Brisbane and Women's  
4  
5 375 Hospital Human Research Ethics Committee number HREC/16/QRBW/100.  
6  
7  
8

9 376 *Safety considerations*

10  
11  
12 377 The main purpose of the secondary outcome measures of the intervention is to  
13  
14 378 measure the safety of using this implementation approach. A potential safety issue  
15  
16 379 is that when patients complete the PROMs they expect that staff will act on that  
17  
18 380 information. If the implementation is not successful, staff may not do this in a timely  
19  
20 381 fashion or at all, and patients who report symptoms may not receive suitable  
21  
22 382 treatment. Any such issues where a PROMs report was not acted on will be noted  
23  
24 383 and described using the data collection tools for the project. The facilitator will raise  
25  
26 384 any issues where patient safety is at risk.  
27  
28  
29  
30

31  
32 385 *Data deposition and curation:*

33  
34  
35 386 All de-identified data will be stored on a REDCap database, on a secure university  
36  
37 387 server. Patient information will be stored on their medical record, and hospital-based  
38  
39 388 servers that are password protected. Data will be stored for 5 years. A formal data  
40  
41 389 management plan has been developed and approved by the Queensland University  
42  
43 390 of Technology Research Unit.  
44  
45  
46  
47

48 391 *Dissemination of results*

49  
50  
51 392 Results will be disseminated in peer-reviewed publications, and presented at  
52  
53 393 national and international scientific meetings.  
54  
55  
56

57 394  
58  
59  
60

1  
2  
3 395 *Discussion:*  
4  
5

6 396 This study proposes that successful implementation of PROMs requires  
7  
8 397 sophisticated attention to the local clinical setting and existing clinical workflows, and  
9  
10 398 can overcome barriers previously experienced in other settings by following a pre-  
11  
12 399 specified implementation approach with an experienced facilitator. It is important to  
13  
14 400 investigate implementation strategies as clinical trials have demonstrated significant  
15  
16 401 benefits for patients, but also reported the difficulties of using PROMs in complex  
17  
18 402 health systems outside the highly structured context of a clinical trial. Systematic  
19  
20 403 reviews recommend a structured implementation approach that considers the many  
21  
22 404 elements present in the health system into which PROMs are introduced. The use of  
23  
24 405 the iPARIHS framework with the MRC Guidelines for Implementation of Complex  
25  
26 406 Interventions, built upon the work of ISOQOL, offers an implementation strategy that  
27  
28 407 addresses the issues identified in the research to date. This study offers an  
29  
30 408 opportunity to scientifically measure implementation, potentially rapidly implement  
31  
32 409 PROMs into clinical practice and to inform future research and clinical practice.  
33  
34  
35  
36  
37  
38  
39  
40 410 Trial Status: Opened on 25 March 2018 and will continue until 12 months after the  
41  
42 411 last PROMs reporting encounter.  
43  
44

45 412 *References:*  
46  
47

- 48 413 1. Coons, S.J., et al., *Recommendations on evidence needed to support*  
49  
50 414 *measurement equivalence between electronic and paper-based patient-*  
51  
52 415 *reported outcome (PRO) measures: ISPOR ePRO Good Research Practices*  
53  
54 416 *Task Force report*. Value Health, 2009. 12(4): p. 419-29.  
55  
56  
57  
58  
59  
60

- 1  
2  
3 417 2. Revicki, D.A., et al., *Recommendations on health-related quality of life*  
4  
5 418 *research to support labeling and promotional claims in the United States*. Qual  
6  
7 419 Life Res, 2000. 9(8): p. 887-900.
- 8  
9  
10 420 3. Antunes, B., Harding, R., Higginson, IJ. *Implementing patient-reported*  
11  
12 421 *outcome measures in palliative care clinical practice: a systematic review of*  
13  
14 422 *facilitators and barriers*. Palliat Med, 2014. 28(2): p. 158-75.
- 15  
16  
17 423 4. Sharma, P., et al., *Evaluation of point-of-care PRO assessment in clinic*  
18  
19 424 *settings: integration, parallel-forms reliability, and patient acceptability of*  
20  
21 425 *electronic QOL measures during clinic visits*. Qual Life Res, 2016. 25(3): p.  
22  
23 426 575-83.
- 24  
25  
26 427 5. Basch, E., et al., *Symptom Monitoring With Patient-Reported Outcomes*  
27  
28 428 *During Routine Cancer Treatment: A Randomized Controlled Trial*. J Clin  
29  
30 429 Oncol, 2016. 34(6): p. 557-65.
- 31  
32  
33 430 6. Velikova, G., et al., *Patients report improvements in continuity of care when*  
34  
35 431 *quality of life assessments are used routinely in oncology practice: secondary*  
36  
37 432 *outcomes of a randomised controlled trial*. Eur J Cancer, 2010. 46(13): p.  
38  
39 433 2381-8.
- 40  
41  
42 434 7. Klinkhammer-Schalke, M., et al., *Direct improvement of quality of life using a*  
43  
44 435 *tailored quality of life diagnosis and therapy pathway: randomised trial in 200*  
45  
46 436 *women with breast cancer*. Br J Cancer, 2012. 106(5): p. 826-38.
- 47  
48  
49 437 8. Basch, E., et al., *Overall survival results of a trial assessing patient-reported*  
50  
51 438 *outcomes for symptom monitoring during routine cancer treatment*. JAMA,  
52  
53 439 2017. 318(2): p. 197-198.
- 54  
55  
56  
57  
58  
59  
60

- 1  
2  
3 440 9. Denis, F., et al., *Randomized Trial Comparing a Web-Mediated Follow-up*  
4  
5 441 *With Routine Surveillance in Lung Cancer Patients*. J Natl Cancer Inst, 2017.  
6  
7 442 109(9).  
8  
9  
10 443 10. Basch, E., et al., *Overall Survival Results of a Trial Assessing Patient-*  
11  
12 444 *Reported Outcomes for Symptom Monitoring During Routine Cancer*  
13  
14 445 *Treatment*. Jama, 2017. 318(2): p. 197-198.  
15  
16  
17 446 11. Porter, I., et al., *Framework and guidance for implementing patient-reported*  
18  
19 447 *outcomes in clinical practice: evidence, challenges and opportunities*. J Comp  
20  
21 448 Eff Res, 2016. 5(5): p. 507-19.  
22  
23  
24 449 12. Duncan, E.A., Murray, J. *The barriers and facilitators to routine outcome*  
25  
26 450 *measurement by allied health professionals in practice: a systematic review*.  
27  
28 451 BMC Health Serv Res, 2012. 12: p. 96.  
29  
30  
31 452 13. Snyder, C.F., et al., *Implementing patient-reported outcomes assessment in*  
32  
33 453 *clinical practice: a review of the options and considerations*. Qual Life Res,  
34  
35 454 2012. 21(8): p. 1305-14.  
36  
37  
38 455 14. Craig, P., Petticrew, M. *Developing and evaluating complex interventions:*  
39  
40 456 *reflections on the 2008 MRC guidance*. Int J Nurs Stud, 2013. 50(5): p. 585-7.  
41  
42 457 15. Nilsen, P., *Making sense of implementation theories, models and frameworks*.  
43  
44 458 Implement Sci, 2015. 10: p. 53.  
45  
46  
47 459 16. Harvey, G. Kitson, A. *PARIHS revisited: from heuristic to integrated*  
48  
49 460 *framework for the successful implementation of knowledge into practice*.  
50  
51 461 Implement Sci, 2016. 11: p. 33.  
52  
53  
54 462 17. Baskerville, N.B., Liddy, C., Hogg, W. *Systematic review and meta-analysis of*  
55  
56 463 *practice facilitation within primary care settings*. Ann Fam Med, 2012. 10(1): p.  
57  
58 464 63-74.  
59  
60

- 1  
2  
3 465 18. Moore, G.F., et al., *Process evaluation of complex interventions: Medical*  
4  
5 466 *Research Council guidance*. *Bmj*, 2015. 350: p. h1258.  
6  
7  
8 467 19. Hemming, K., Girling, A. *A menu-driven facility for power and detectable-*  
9  
10 468 *difference calculations in stepped-wedge cluster-randomized trials*. *Stata*  
11  
12 469 *Journal*, 2014. 14(2): p. 363-380.  
13  
14  
15 470 20. Fuller, C., et al., *The Feedback Intervention Trial (FIT)--improving hand-*  
16  
17 471 *hygiene compliance in UK healthcare workers: a stepped wedge cluster*  
18  
19 472 *randomised controlled trial*. *PLoS One*, 2012. 7(10): p. e41617.  
20  
21 473 21. Campbell, M., et al., *Framework for design and evaluation of complex*  
22  
23 474 *interventions to improve health*. *Bmj*, 2000. 321(7262): p. 694-6.  
24  
25  
26 475 22. Hughes, J.P., Granston, T.S, Heagerty, P.J. *Current issues in the design and*  
27  
28 476 *analysis of stepped wedge trials*. *Contemp Clin Trials*, 2015. 45(Pt A): p. 55-  
29  
30 477 60.  
31  
32  
33 478 23. Liao, X., Zhou, X., Spiegelman, D. *A note on "Design and analysis of stepped*  
34  
35 479 *wedge cluster randomized trials"*. *Contemp Clin Trials*, 2015. 45(Pt B): p. 338-  
36  
37 480 339.  
38  
39  
40 481 24. Pinnock, H., et al., *Standards for Reporting Implementation Studies (StaRI)*  
41  
42 482 *Statement*. *BMJ*, 2017. 356: p. i6795.  
43  
44  
45 483 25. Rouette, J., et al. *Integrating health-related quality of life findings from*  
46  
47 484 *randomized clinical trials into practice: an international study of oncologists'*  
48  
49 485 *perspectives*. *Qual Life Res* 2015. 24:1317-1325.  
50  
51 486 26. National Institute of Health. *Common Terminology Criteria for Adverse Events*  
52  
53 487 *v4.0 (CTCAE)*. *US Department of health and human services, May 28 2009*.  
54  
55 488 2009.  
56  
57  
58  
59  
60



- 1  
2  
3 489 27. Dueck, AC., et al. *Validity and reliability of the US National Cancer Institute's*  
4  
5 490 *Patient-Reported Outcomes Version of the Common Terminology Criteria for*  
6  
7 491 *Adverse Events (PRO-CTCAE)*. JAMA Oncology 2015. 1(8): 1051-1059.
- 8  
9  
10 492 28. Hangelstein, V., et al. *Validation of the German patient reported outcomes*  
11  
12 493 *version of the common terminology criteria for adverse events (PRO-CTCAE)*.  
13  
14 494 *Annals of Oncology* 2016. 27(12): 2294-2299.
- 15  
16  
17 495 29. Baeksted, C., et al. *Feasibility and acceptability of electronic symptom*  
18  
19 496 *surveillance with clinician feedback using the Patient-Reported Outcomes*  
20  
21 497 *version Common Terminology Criteria for Adverse Events (PRO-CTCAE) in*  
22  
23 498 *Danish prostate cancer patients*. J Patients Rep Outcomes 2017. 1(1).
- 24  
25  
26 499 30. Braithwaite, J., *Changing how we think about healthcare improvement*. Bmj,  
27  
28 500 2018. 361: p. k2014.
- 29  
30  
31 501 31. Bainbridge, D., et al., *Multidisciplinary health care professionals' perceptions*  
32  
33 502 *of the use and utility of a symptom assessment system for oncology patients*.  
34  
35 503 *J Oncol Pract*, 2011. 7(1): p. 19-23.
- 36  
37  
38 504 32. Detmar, S.B., et al., *Health-related quality-of-life assessments and patient-*  
39  
40 505 *physician communication: a randomized controlled trial*. JAMA, 2002. 288(23):  
41  
42 506 p. 3027-34.
- 43  
44  
45 507 33. Berry, D.L., et al., *The electronic self report assessment and intervention for*  
46  
47 508 *cancer: promoting patient verbal reporting of symptom and quality of life*  
48  
49 509 *issues in a randomized controlled trial*. BMC Cancer, 2014. 14: p. 513.
- 50  
51 510 34. Hooper, R., et al., *Sample size calculation for stepped wedge and other*  
52  
53 511 *longitudinal cluster randomised trials*. Stat Med, 2016. 35(26): p. 4718-4728.
- 54  
55  
56  
57  
58  
59  
60

- 1  
2  
3 512 35. Grayling, M.J., Wason, J.M., Mander, A.P. *Stepped wedge cluster*  
4  
5 513 *randomized controlled trial designs: a review of reporting quality and design*  
6  
7 514 *features*. *Trials*, 2017. 18(1): p. 33.  
8  
9  
10 515 36. Silverman, D. *Interpreting Qualitative Data*. . 2006. Sage: London.  
11  
12 516 37. Miles, M., Huberman, A, Saldana, J. *Qualitative Data Analysis: A Methods*  
13  
14 517 *Sourcebook*. 2014, California: Sage.

16  
17  
18 518  
19  
20  
21

22 519 Author Affiliations

23  
24  
25 520 This protocol was developed as a component of a PhD project. The student and  
26  
27 521 supervisory team participated in the implementation science based approach of  
28  
29 522 protocol development.

30  
31  
32 523 Natasha Roberts, Queensland University of Technology, Kelvin Grove, QLD,  
33

34 524 Australia, and Royal Brisbane and Women's Hospital, Herston, QLD, Australia

35  
36  
37 525 Monika Janda, Centre for Health Services Research, The University of Queensland,  
38

39 526 Woolloongabba, QLD, Australia

40  
41  
42 527 Alison Mudge, Department of Internal Medicine, Royal Brisbane and Women's  
43

44 528 Hospital, Herston, QLD, Australia

45  
46  
47  
48 529 Kimberly Alexander, School of Nursing, Queensland University of Technology, Kelvin  
49

50 530 Grove, QLD, Australia

51  
52  
53  
54 531 David Wyld, Cancer Care Services, Royal Brisbane and Women's Hospital, Herston,  
55

56 532 QLD, Australia

57  
58  
59 533 Contributorship statement:

1  
2  
3 534 NR and MJ drafted the protocol for this publication. AM contributed significantly to  
4  
5 535 the drafting of this publication, particularly with expertise in implementation science  
6  
7  
8 536 and multi-disciplinary care. KA contributed expertise regarding nursing care,  
9  
10 537 symptom management and PROMs. DW contributed expertise regarding specialist  
11  
12 538 medical care and health services management.  
13  
14  
15

#### 16 539 Acknowledgements

17  
18  
19 540 I would like to acknowledge supervision and knowledge of my PhD supervisors MJ,  
20  
21 541 KA and DW, and ongoing expertise and support from AM. Appreciation also goes to  
22  
23 542 the Metro North Research Unit, and the Queensland University of Technology.  
24  
25  
26

27 543 Thanks must go to the staff of the multi-disciplinary team in Cancer Care Services at  
28  
29 544 the Royal Brisbane and Women's Hospital (RBWH) who contributed their time,  
30  
31 545 knowledge and expertise to the development of this protocol, in, Jenni Leutenegger,  
32  
33 546 Therese Hayes and Annette Cubitt. Thanks also to the Consumer Representatives  
34  
35 547 at RBWH for their time in protocol development and pre-implementation data  
36  
37 548 collection, in particular Gary Power and Anita McGrath who gave their time  
38  
39 549 contributing to the development of patient education and patient information sheets.  
40  
41  
42  
43

#### 44 550 Funding:

45  
46  
47  
48 551 This work is supported by the Royal Brisbane and Women's Hospital Postgraduate  
49  
50 552 Scholarship and a QUT APA Scholarship. Computer equipment and infrastructure is  
51  
52 553 funded by the "Susan Sudak Day to End Cancers" Diamond Care Grant.  
53  
54  
55

#### 56 554 Competing interests statement:

57  
58  
59 555 There are none to declare  
60

1  
2  
3 556  
4  
5  
6  
7 557  
8  
9  
10 558  
11  
12  
13  
14  
15  
16  
17  
18  
19  
20  
21  
22  
23  
24  
25  
26  
27  
28  
29  
30  
31  
32  
33  
34  
35  
36  
37  
38  
39  
40  
41  
42  
43  
44  
45  
46  
47  
48  
49  
50  
51  
52  
53  
54  
55  
56  
57  
58  
59  
60

For peer review only
